# Supplementary material
Source: PubMed Central journal article supplement (PMC4009363)
Supplement: NIHMS574573-supplement-Supplemental_Data.pdf [file NIHMS574573-supplement-Supplemental_Data.pdf]

# Niche-based screening identifies small-molecule inhibitors of leukemia stem cells

Kimberly A Hartwell<sup>1-3,13</sup>, Peter G Miller<sup>2,3,13</sup>, Siddhartha Mukherjee<sup>4,12</sup>, Alissa R Kahn<sup>5</sup>, Alison L Stewart<sup>1</sup>, David J Logan<sup>1</sup>, Joseph M Negri<sup>1</sup>, Mildred Duvet<sup>1,4</sup>, Marcus Järås<sup>2</sup>, Rishi Puram<sup>2,3</sup>, Vlado Dancik<sup>1</sup>, Fatima Al-Shahrour<sup>1,2</sup>, Thomas Kindler<sup>2</sup>, Zuzana Tothova<sup>2,3</sup>, Shrikanta Chattopadhyay<sup>1,6</sup>, Thomas Hasaka<sup>1</sup>, Rajiv Narayan<sup>1</sup>, Mingji Dai<sup>1,10</sup>, Christina Huang<sup>1</sup>, Sebastian Shterental<sup>2</sup>, Lisa P Chu<sup>2</sup>, J Erika Haydu<sup>2</sup>, Jae Hung Shieh<sup>5</sup>, David P Steensma<sup>3,7</sup>, Benito Munoz<sup>1</sup>, Joshua A Bittker<sup>1</sup>, Alykhan F Shamji<sup>1</sup>, Paul A Clemons<sup>1</sup>, Nicola J Tolliday<sup>1</sup>, Anne E Carpenter<sup>1</sup>, D Gary Gilliland<sup>1,2,7,8,12</sup>, Andrew M Stern<sup>1,12</sup>, Malcolm A S Moore<sup>9\*</sup>, David T Scadden<sup>1,4,6\*</sup>, Stuart L Schreiber<sup>1,8,10\*</sup>, Benjamin L Ebert<sup>1-3,7\*</sup> & Todd R Golub<sup>1,3,8,11\*</sup>

<sup>1</sup>Broad Institute of MIT and Harvard, Cambridge, MA 02142, USA. <sup>2</sup>Division of Hematology, Department of Medicine, Brigham and Women's Hospital and Harvard Medical School, Boston, MA 02115, USA. <sup>3</sup>Harvard Medical School, Boston, MA 02115, USA. <sup>4</sup>Center for Regenerative Medicine and Cancer Center, Massachusetts General Hospital, Boston, MA 02114, USA. <sup>5</sup>Department of Pediatrics, Memorial Sloan-Kettering Cancer Center, New York, NY 10021, USA. <sup>6</sup>Department of Stem Cell and Regenerative Biology, Harvard University, Cambridge, MA 02138, USA. <sup>7</sup>Department of Medical Oncology, Dana-Farber Cancer Institute, Harvard Medical School, Boston, MA 02115, USA. <sup>8</sup>Howard Hughes Medical Institute, Harvard Medical School, Chevy Chase, MD 20815, USA. <sup>9</sup>Cell Biology Program, Memorial Sloan-Kettering Cancer Center, New York, NY 10021, USA. <sup>10</sup>Department of Chemistry and Chemical Biology, Harvard University, Cambridge, MA 02138, USA. <sup>11</sup>Department of Pediatric Oncology, Dana-Farber Cancer Institute, Boston, MA 02115, USA. <sup>12</sup>Present addresses: Department of Medicine and Irving Cancer Research Center, Columbia University School of Medicine, New York, NY 10032, USA (S.M.); Merck Research Laboratories, West Point, PA 19446, USA (D.G.G.); Department of Computational and Systems Biology, University of Pittsburgh Drug Discovery Institute, Pittsburgh, PA 15260, USA (A.M.S.). <sup>13</sup>These authors contributed equally to this work. \* e-mail: [m-moore@ski.mskcc.org](mailto:m-moore@ski.mskcc.org), [dscadden@mgh.harvard.edu](mailto:dscadden@mgh.harvard.edu), [stuart\\_schreiber@harvard.edu](mailto:stuart_schreiber@harvard.edu), [bebert@partners.org](mailto:bebert@partners.org) or [golub@broadinstitute.org](mailto:golub@broadinstitute.org)

## **Supplementary Results**

Supplementary Figures 1-5

Supplementary Tables 1-6

Supplementary Note 1

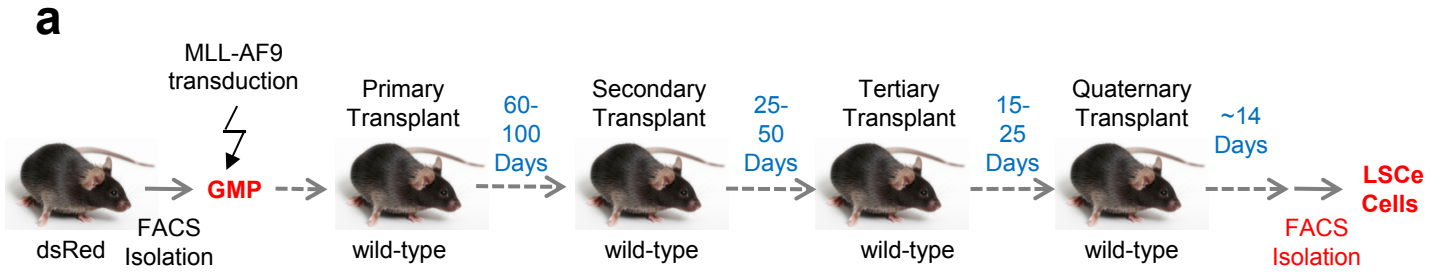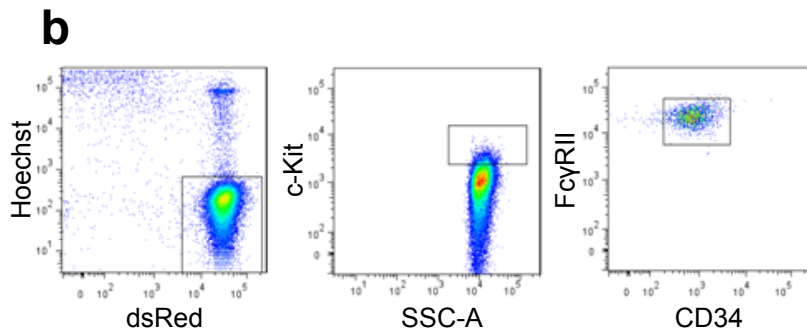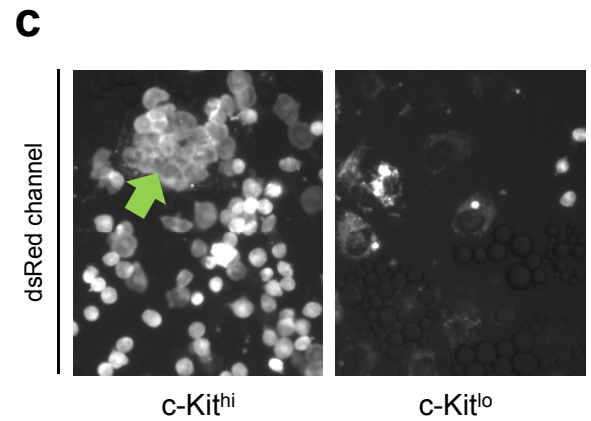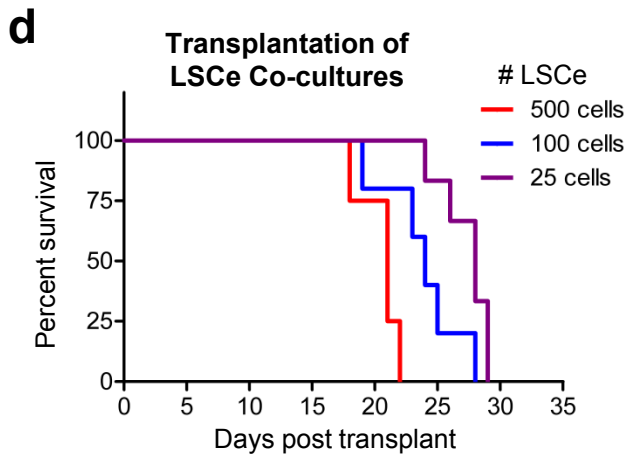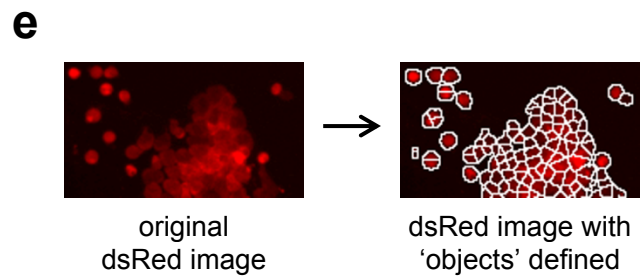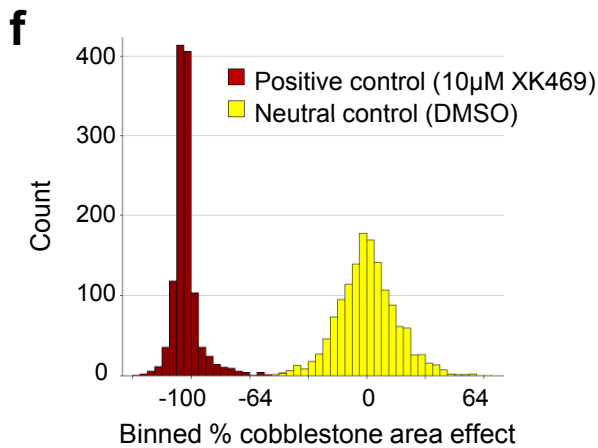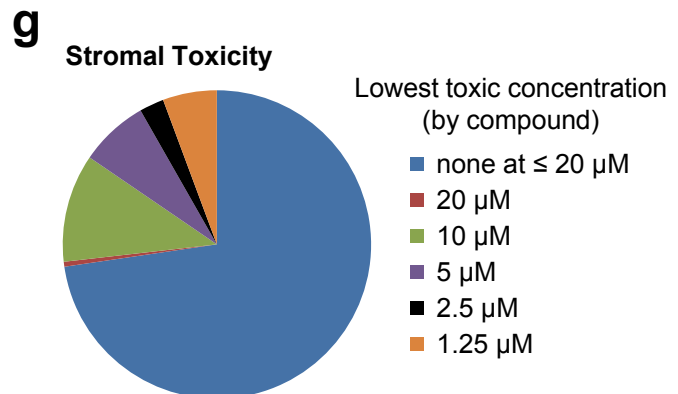

## Supplementary Figure 1 | A High-Throughput System for Probing Primary, Stem-enriched Leukemia Cells Within a Stromal Niche

(a) Primary, stem cell-enriched, murine leukemia cells (LSCe cells) were generated as shown for high throughput screening. Granulocyte-Monocyte Progenitors (GMPs) were isolated by fluorescence-activated cell sorting (FACS) from  $\beta$ -actin dsRed mice, transduced with the MLL-AF9 oncogene, and transplanted into lethally-irradiated wild-type mice. At disease onset, splenocytes were transplanted through 3 additional rounds of recipient animals to generate quaternary leukemic mice. Whole bone marrow was harvested from these animals at disease onset, and (b) the LSCe population was isolated by flow cytometry using defined immunophenotypic markers  $\text{Hoechst}^- \text{dsRed}^+ \text{c-Kit}^{\text{hi}} \text{Fc}\gamma\text{RII}^{\text{hi}} \text{CD34}^{\text{hi}}$  following Lin and Sca-1 depletion. Representative gating strategies are shown. Also see Methods. (c) When LSC-enriched (LSCe) cells ( $\text{c-Kit}^{\text{hi}}$ ) and LSC-depleted cells ( $\text{c-Kit}^{\text{lo}}$ ) are plated into co-culture with OP9 stroma at identical densities, the  $\text{c-Kit}^{\text{hi}}$  cells form CAFCs (arrow) with greater efficiency than the  $\text{c-Kit}^{\text{lo}}$  cells. Qualitative images representative of two independent experiments are shown. (d) Kaplan-Meier survival curves of mice transplanted with co-cultures generated from 500, 100, or 25 LSCe cells on bone marrow mesenchymal stromal cell (BMSC) stroma at the 6-day assay endpoint ( $n \geq 4$  as shown). (e) The CellProfiler segmentation algorithm divides each individual cell into one or more subcellular areas (termed “objects;” See Methods), shown outlined in white. (f) Distribution of neutral control (DMSO only) and positive control (10  $\mu\text{M}$  XK469, a topoisomerase II $\beta$  inhibitor) wells. (g) The performance of 196 prioritized compounds in the stromal toxicity counterscreen, by lowest toxic concentration. A concentration range of 160 nM to 20  $\mu\text{M}$  was examined with OP9 and primary BMSC stromal monolayers grown alone, at 8 concentrations, with a viability readout (CellTiter-Glo). Compounds showing toxicity towards either type of stroma at or below 10  $\mu\text{M}$  were excluded from further study.

**a**

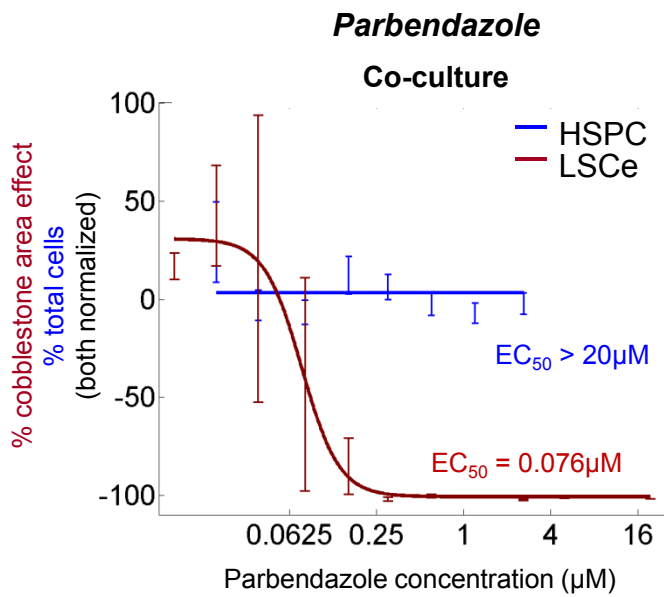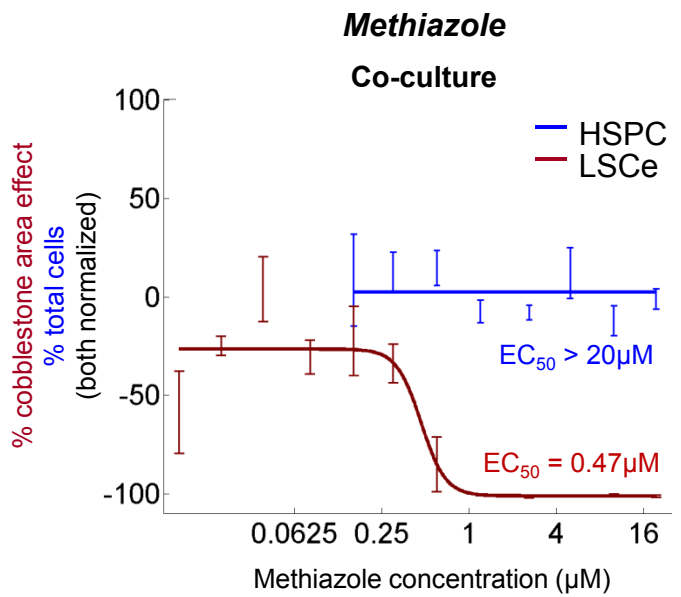

**b**

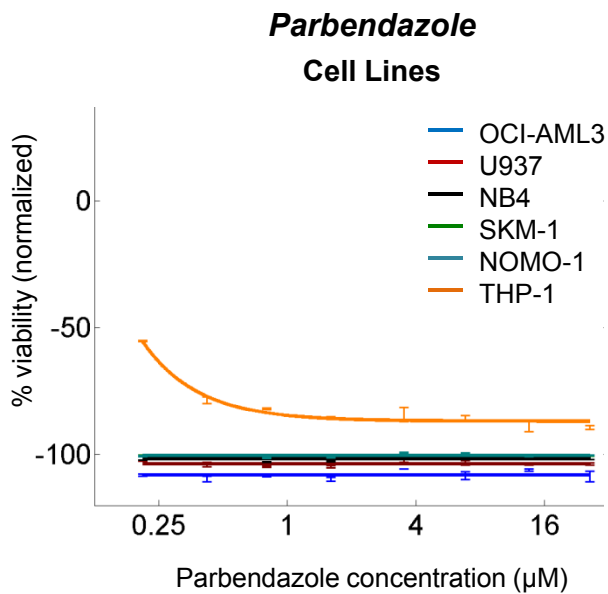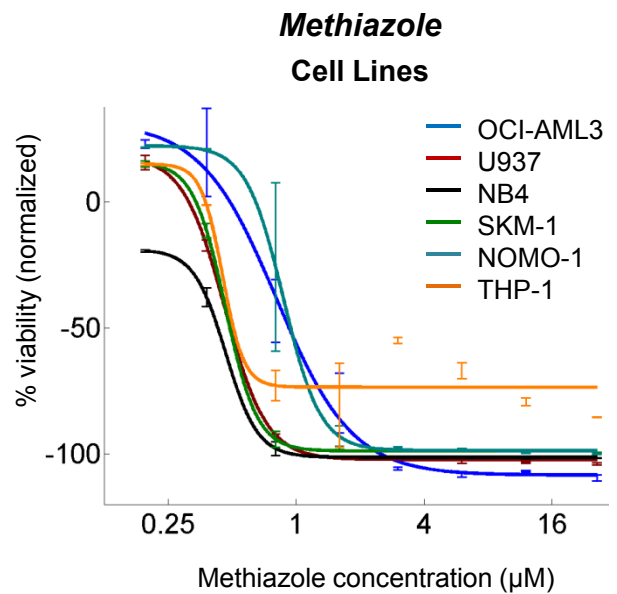

## **Supplementary Figure 2 | Prioritized Screening Hits Display LSCe Cell Selectivity Relative to HSPCs in Co-culture**

(a) Dose-response curves for parbendazole and methiazole on LSCe cells (2 replicates per concentration) and normal HSPCs (6 replicates per concentration) in co-culture on primary BMSC stroma. (b) These benzimidazole carbamates also displayed strong activity against human AML cell lines (shown as mean  $\pm$  SEM of duplicate replicates).

### a Stromal Pretreatment Screen

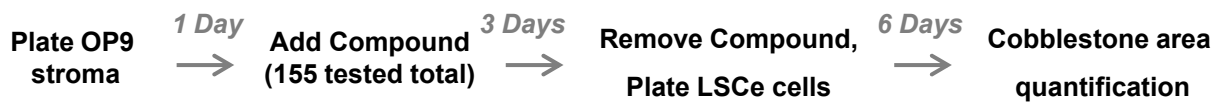

### b troglitazone

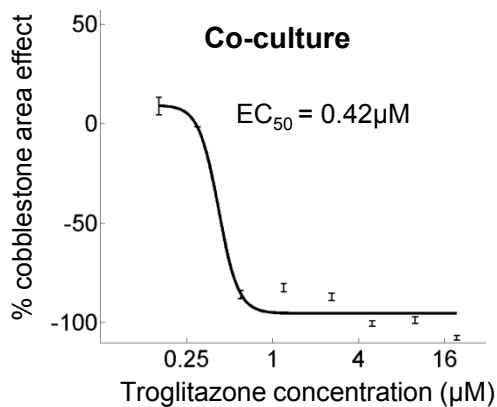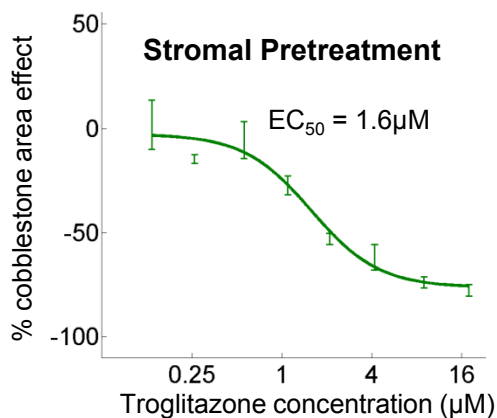

### c

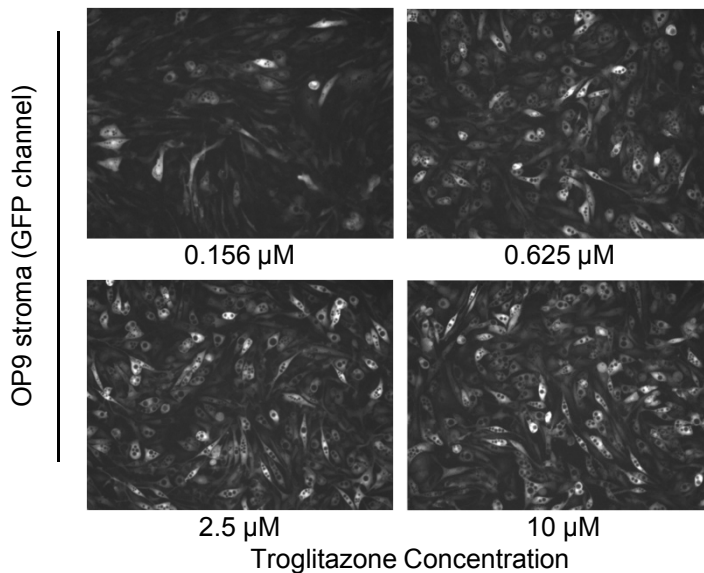

### d

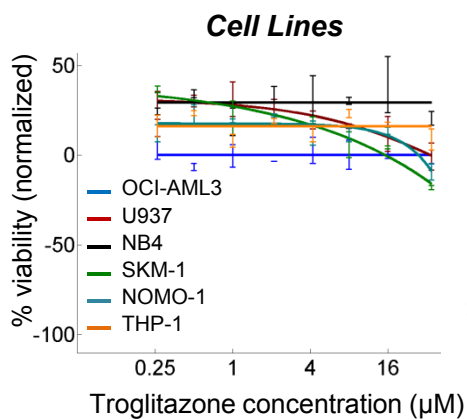

### e

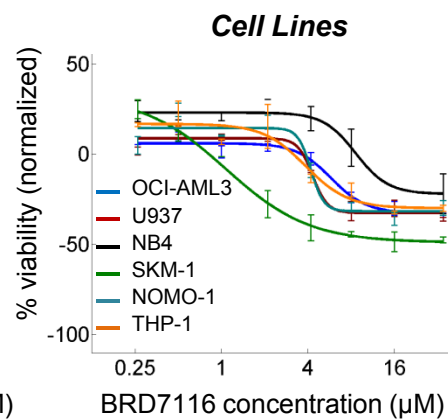

### f

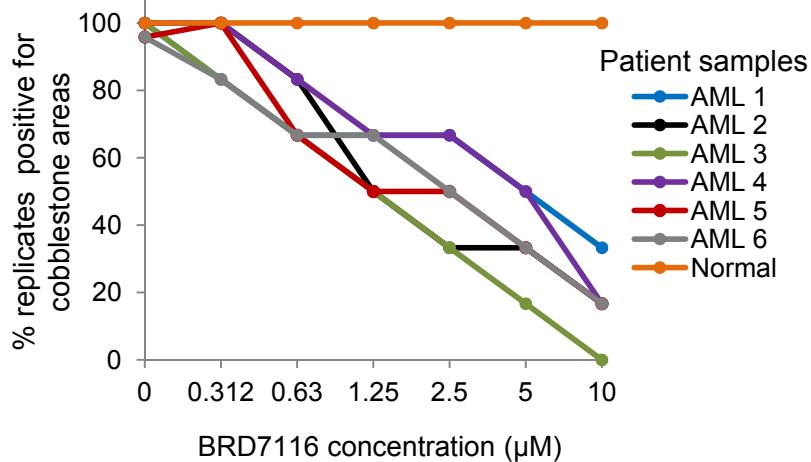

### g

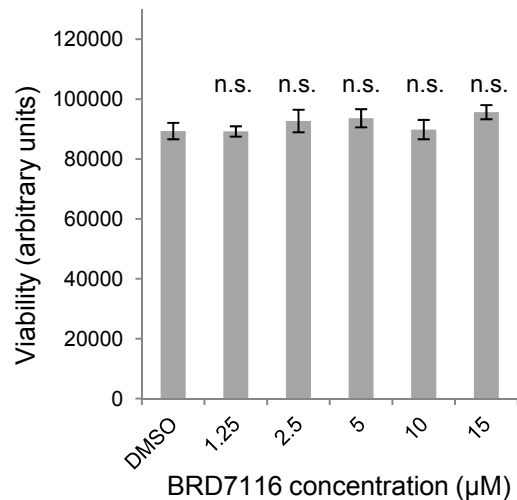

### **Supplementary Figure 3 | Novel Small Molecule BRD7116 Selectively Targets LSCe Cells by Both Cell-Autonomous and Cell-Non-Autonomous Mechanisms**

(a) A stromal pretreatment secondary screen identified compounds that antagonize leukemia cobblestone area formation indirectly through the stroma. (b) Normalized dose-response curves for troglitazone, a PPAR- $\gamma$  agonist in the LSCe cell retest and stromal pretreatment screens, both with OP9 stroma in duplicate. (c) Representative images of OP9 stroma treated with troglitazone, consistent with adipocytic differentiation. (d) Troglitazone dose-response curves for 6 human AML cell lines. Data is mean  $\pm$  SEM for duplicate replicates. (e) BRD7116 dose-response curves for 6 human AML cell lines, with incomplete inhibition relative to positive controls. (f) The effects of BRD7116 on CAFC activity of primary human CD34<sup>+</sup> cells isolated from either normal or leukemic patient samples. Co-cultures were treated for 6 days, and then rinsed. The fraction of replicate co-cultures containing cobblestone areas at the 5-week assay endpoint (2 weeks for FLT3-ITD sample) is shown ( $n \geq 6$ ). The clinical characteristics of the AML samples are described in Figure 4b. (g) Viability of BMSC stromal cells pretreated with BRD7116 prior to the plating of admixed LSCe and HSPC cells (as mean  $\pm$  SEM of quadruplicate replicates), from stromal monolayers cultured in the absence of hematopoietic cells in parallel for the same length of time as the stromal pretreatment screen depicted in Figure 3c. n.s. = not significant relative to DMSO-treated controls.



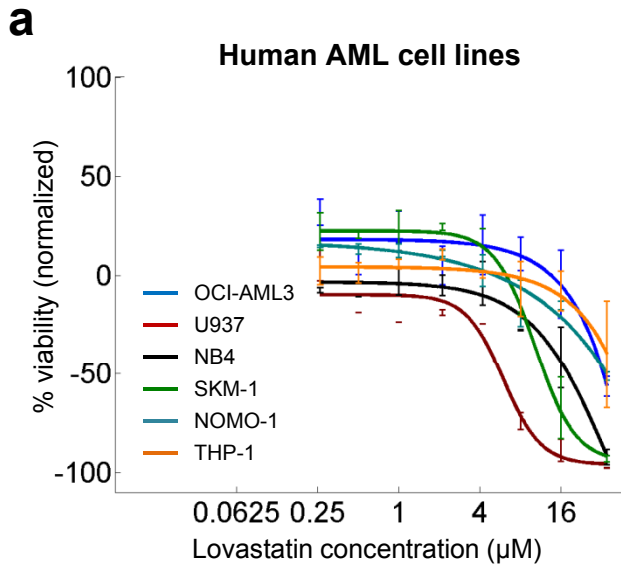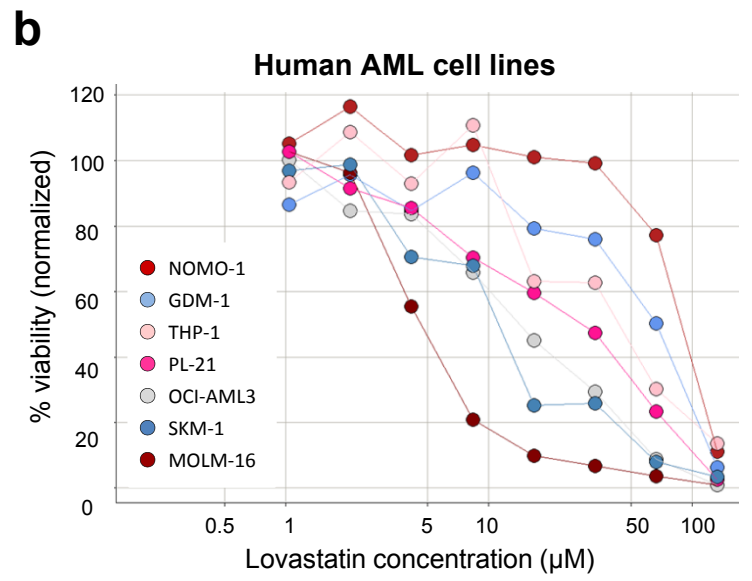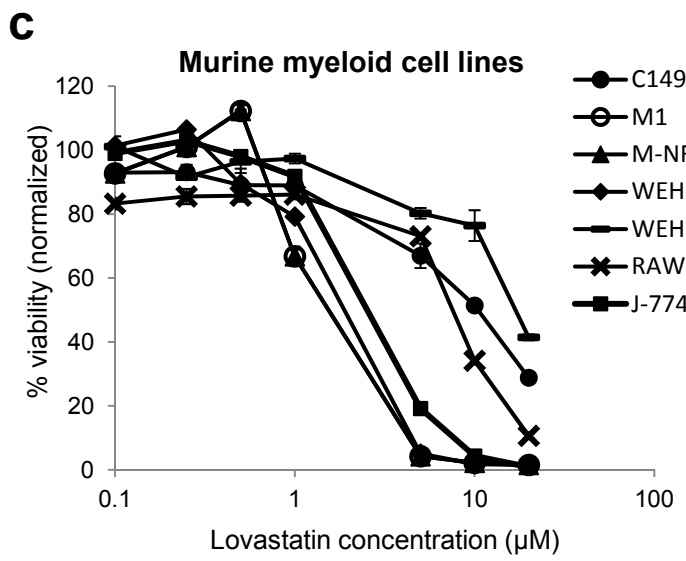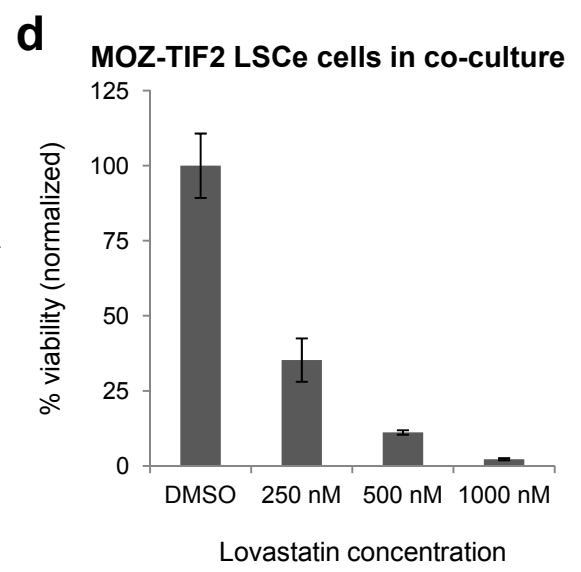

## **Supplementary Figure 4 | Lovastatin Selectively Inhibits Murine and Human Leukemia Cells in Co-culture**

(a) Lovastatin activity against human AML cell lines (in duplicate). (b) Dose-response curves for lovastatin from an additional, independent human AML cell line screen (see Methods). Effects were normalized between DMSO control, set at 100, and media only (no cells), set at zero. (c) Lovastatin dose-response curves for 7 murine myeloid cell lines. Data are represented as mean  $\pm$  SEM of duplicate replicates. (d) Quantification of lovastatin effects on MOZ-TIF2 LSCe cells in co-culture (normalized to DMSO control; as mean  $\pm$  SEM) by flow cytometry analysis ( $n \geq 3$ ).

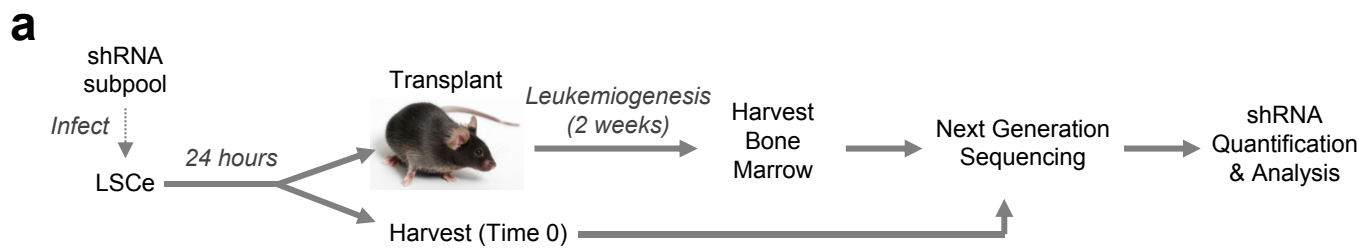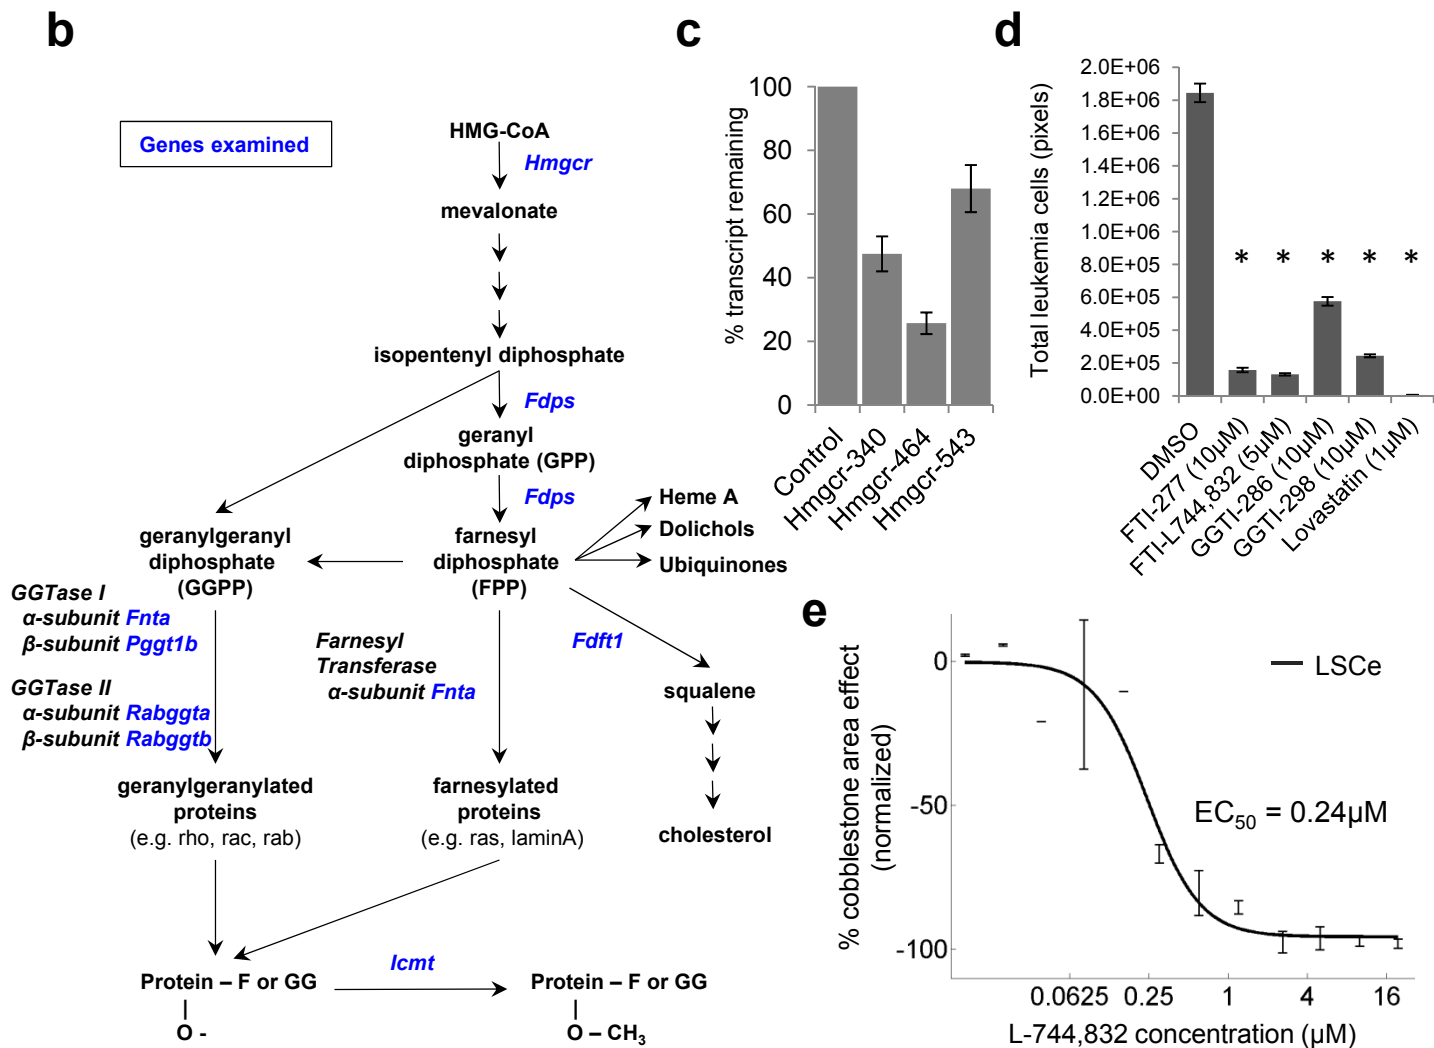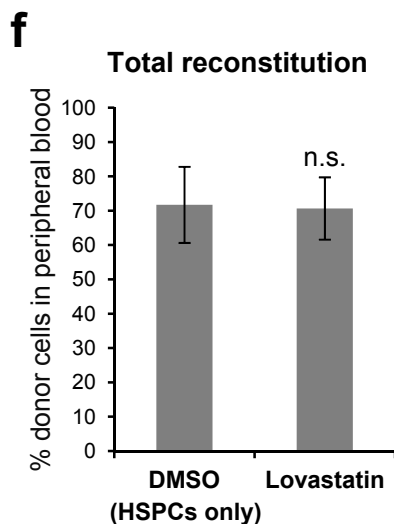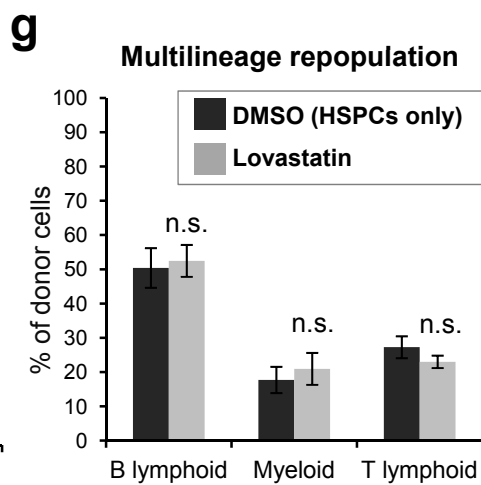

## Supplementary Figure 5 | Sensitivity of LSCe Cells to HMGCR Inhibition

(a) Schematic representation of *in vivo* shRNA screening strategy. Primary LSCe cells were infected with a pool of shRNA lentiviruses targeting genes within the mevalonate pathway as well as control genes. After 24 hours, a portion of the cells were harvested and the remainder transplanted into recipient mice. After 2 weeks, at the onset of leukemogenesis, the leukemia cells in the bone marrow were harvested and the change in shRNA frequency was determined relative to Time 0 (See Methods).

(b) Schematic indicating the location of the genes examined *in vivo* by shRNA pooled screening within the mevalonate pathway. (c) Quantification of Hmgcr RNA knockdown in murine Ba/F3 cells for the Hmgcr shRNAs that scored in the screen relative to three control shRNAs (LUC-58, RFP-03, LacZ-29).

(d) The effects of various chemical inhibitors of farnesyl and geranylgeranyl transferases on LSCe cells co-cultured with OP9 stromal cells at the 6 day assay endpoint. Data are mean  $\pm$  SEM of triplicate replicates. \*  $p < 0.001$  relative to DMSO-treated controls. (e) The farnesyltransferase inhibitor L-744,832 was also a hit in the co-culture screen and passed initial selectivity filtering steps. The dose-response curve for LSCe cells co-cultured with BMSC stroma is shown. (f) The long-term engraftment of admixed normal HSPCs quantified by flow cytometric analysis at 16 weeks post transplantation was not impaired by lovastatin treatment (compared to DMSO-treated co-cultures containing HSPCs alone). Mean  $\pm$  SEM is shown ( $n = 5$ ). n.s. = not significant, relative to DMSO controls. (g) Multilineage repopulation (as frequency of cell types in peripheral blood) at 16 weeks post transplantation was also unaffected by lovastatin treatment. Mean  $\pm$  SEM is shown ( $n = 5$ ). n.s. = not significant, relative to DMSO controls.

**Supplementary Table 1 | Image-based Rules Defining the CAFc Phenotype**

| Rule # | Rule                                                           | Explanation                                                                                                               |
|--------|----------------------------------------------------------------|---------------------------------------------------------------------------------------------------------------------------|
| 1      | CellsdsRed_Neighbors_PercentTouching_2 > 69.2                  | Cell objects that have >69% of their perimeter touching other objects, after expanding 2 pixels                           |
| 2      | CellsdsRed_Texture_GaborY_CorrdsRed_3 < 13.9                   | Cell objects with texture feature (Gabor wavelet in Y direction) < 13.9 at a 3 pixel scale in the dsRed channel           |
| 3      | CellsdsRed_Neighbors_NumberOfNeighbors_2 > 3.0                 | Cell objects with > 3 neighbor objects (within 2 pixels)                                                                  |
| 4      | CellsdsRed_Texture_Contrast_CorrdsRed_3 < 9.55                 | Cell objects with low texture contrast at a 3 pixel scale in the dsRed channel                                            |
| 5      | CellsdsRed_Intensity_MinIntensity_CorrdsRed > 0.104            | Cell objects with the minimum intensity across all their pixels in the dsRed channel > 0.104                              |
| 6      | CellsdsRed_Intensity_StdIntensity_CorrdsRed < 0.0312           | Cell objects with standard deviation of pixel intensities in dsRed channel < 0.03 (a measure of texture)                  |
| 7      | CellsdsRed_Intensity_MinIntensity_CorrStroma > 0.109           | Cell objects with the minimum intensity across all their pixels in the stromal channel > 0.109                            |
| 8      | CellsdsRed_Neighbors_NumberOfNeighbors_2 > 2.0                 | Cell objects with >2 neighbor objects (within 2 pixels)                                                                   |
| 9      | CellsdsRed_Zernike_9_9 > 0.0185                                | Cell objects with a 9 <sup>th</sup> /9th order Zernike shape feature > 0.018                                              |
| 10     | CellsdsRed_Texture_SumEntropy_CorrdsRed_1 > 2.42               | Cell objects with a low texture feature (Haralick's Sum of Entropy) at a 1 pixel scale in the dsRed channel               |
| 11     | CellsdsRed_Texture_InverseDifferenceMoment_CorrdsRed_1 > 0.571 | Cell objects with a texture feature (Haralick's Inverse Difference Moment) >0.571 at a 1 pixel scale in the dsRed channel |
| 12     | CellsdsRed_Neighbors_AngleBetweenNeighbors_2 < 77.3            | Cell objects with nearby neighbor objects (within 2 pixels) that are within 77 degrees of each other                      |
| 13     | CellsdsRed_Zernike_5_3 > 0.0424                                | Cell objects with a 5 <sup>th</sup> /3rd order Zernike shape feature > 0.0424                                             |
| 14     | CellsdsRed_Neighbors_SecondClosestXVector_2 > -7.82            | Cell objects with their second closest neighbor having an X coordinate vector > -7.82                                     |
| 15     | CellsdsRed_Location_Center_Y < 351.3                           | Cell objects with their centroid Y coordinate < 351 pixels from the origin                                                |
| 16     | CellsdsRed_Texture_GaborX_CorrdsRed_3 < 29.6                   | Cell objects with texture feature (Gabor wavelet in X direction) < 29.6 at a 3 pixel scale in the dsRed channel           |
| 17     | CellsdsRed_Intensity_MinIntensity_CorrdsRed > 0.104            | Cell objects with the minimum intensity across all their pixels in the dsRed channel > 0.104                              |
| 18     | CellsdsRed_Texture_GaborY_CorrdsRed_3 < 18.2                   | Cell objects with texture feature (Gabor wavelet in Y direction) < 18.2 at a 3 pixel scale in the dsRed channel           |
| 19     | CellsdsRed_Neighbors_SecondClosestYVector_2 < 8.75             | Cell objects with their second closest neighbor having an Y coordinate vector < 8.75                                      |
| 20     | CellsdsRed_Zernike_2_2 < 0.058                                 | Cell objects with a 2nd/2nd order Zernike shape feature < 0.058                                                           |
| 21     | CellsdsRed_Neighbors_SecondClosestYVector_2 > -7.62            | Cell objects with their second closest neighbor having an Y coordinate vector < -7.62                                     |
| 22     | CellsdsRed_Zernike_0_0 > 0.615                                 | Cell objects with a 0 <sup>th</sup> /0th order Zernike shape feature (even intensity) > 0.615                             |
| 23     | CellsdsRed_Neighbors_SecondClosestObjectNumber_2 > 636         | Cell objects with their second closest neighbor having an object number > 636                                             |
| 24     | CellsdsRed_Intensity_UpperQuartileIntensity_CorrdsRed > 0.0919 | Cell objects with a pixel intensity of the upper quartile in the dsRed channel > 0.0919                                   |
| 25     | CellsdsRed_Intensity_StdIntensity_CorrdsRed < 0.0154           | Cell objects with a pixel intensity standard deviation in the dsRed channel < 0.0154                                      |
| 26     | CellsdsRed_Texture_GaborX_CorrdsRed_1 > 2.44                   | Cell objects with texture feature (Gabor wavelet in X direction) > 2.44 at a 1 pixel scale in the dsRed channel           |

|    |                                                            | channel                                                                                                                |
|----|------------------------------------------------------------|------------------------------------------------------------------------------------------------------------------------|
| 27 | CellsdsRed_Neighbors_FirstClosestXVector_2 > -6.50         | Cell objects with their closest neighbor having an X coordinate vector > -6.5                                          |
| 28 | CellsdsRed_Neighbors_NumberOfNeighbors_2 > 2.0             | Cell objects with >2 neighbor objects (within 2 pixels)                                                                |
| 29 | CellsdsRed_Texture_DifferenceEntropy_CorrdsRed_1 > 1.58    | Cell objects with a texture feature (Haralick's Difference Entropy) > 1.58 at a 1 pixel scale in the dsRed channel     |
| 30 | CellsdsRed_Texture_Contrast_CorrdsRed_1 < 2.88             | Cell objects with a texture feature (Haralick's Contrast) < 2.88 at a 1 pixel scale in the dsRed channel               |
| 31 | CellsdsRed_Neighbors_FirstClosestXVector_2 > 1.59          | Cell objects with their closest neighbor having an X coordinate vector > 1.59                                          |
| 32 | CellsdsRed_Intensity_MedianIntensity_CorrStroma < 0.220    | Cell objects with a median pixel intensity in the stromal channel < 0.22                                               |
| 33 | CellsdsRed_Intensity_MassDisplacement_CorrStroma > 3.88    | Cell objects with a pixel intensity shift in the grayscale versus binary centroids in the stromal channel > 3.88       |
| 34 | CellsdsRed_Texture_GaborX_CorrdsRed_3 < 19.7               | Cell objects with texture feature (Gabor wavelet in X direction) < 19.7 at a 3 pixel scale in the dsRed channel        |
| 35 | CellsdsRed_Texture_GaborY_CorrdsRed_1 > 1.91               | Cell objects with texture feature (Gabor wavelet in Y direction) > 1.91 at a 1 pixel scale in the dsRed channel        |
| 36 | CellsdsRed_Zernike_4_2 > 0.00394                           | Cell objects with a 4 <sup>th</sup> /2nd order Zernike shape feature > 0.00394                                         |
| 37 | CellsdsRed_Texture_DifferenceEntropy_CorrdsRed_1 < 1.17    | Cell objects with a texture feature (Haralick's Difference Entropy) < 1.17 at a 1 pixel scale in the dsRed channel     |
| 38 | CellsdsRed_Texture_AngularSecondMoment_CorrdsRed_3 > 0.081 | Cell objects with a texture feature (Haralick's Angular Second Moment) > 0.081 at a 3 pixel scale in the dsRed channel |
| 39 | CellsdsRed_Zernike_3_1 > 0.139                             | Cell objects with a 3rd/1st order Zernike shape feature > 0.139                                                        |
| 40 | CellsdsRed_Zernike_2_0 < 0.165                             | Cell objects with a 2nd/0th order Zernike shape feature < 0.165                                                        |
| 41 | CellsdsRed_Zernike_7_5 < 0.0515                            | Cell objects with a 7 <sup>th</sup> /5th order Zernike shape feature < 0.0515                                          |
| 42 | CellsdsRed_Intensity_StdIntensityEdge_CorrdsRed < 0.0261   | Cell objects with standard deviation of pixel intensities along their perimeter in dsRed channel < 0.0261              |
| 43 | CellsdsRed_Intensity_MeanIntensityEdge_CorrdsRed > 0.146   | Cell objects with mean pixel intensities along their perimeter in dsRed channel > 0.146                                |
| 44 | CellsdsRed_Zernike_5_1 > 0.0464                            | Cell objects with a 5 <sup>th</sup> /1st order Zernike shape feature > 0.0464                                          |
| 45 | CellsdsRed_Neighbors_FirstClosestYVector_2 > -6.77         | Cell objects with their closest neighbor having a Y coordinate vector > -6.77                                          |
| 46 | CellsdsRed_Neighbors_SecondClosestYVector_2 > -7.32        | Cell objects with their second closest neighbor having a Y coordinate vector > -7.32                                   |
| 47 | CellsdsRed_AreaShape_Eccentricity < 0.872                  | Cell objects not very elliptical (on a scale of 0=circular to 1=linear/flattened) < 0.872                              |
| 48 | CellsdsRed_Zernike_1_1 < 0.363                             | Cell objects with a 1st/1st order Zernike shape feature < 0.363                                                        |
| 49 | CellsdsRed_Intensity_StdIntensityEdge_CorrdsRed < 0.0326   | Cell objects with standard deviation of pixel intensities along their perimeter in dsRed channel < 0.0326              |
| 50 | CellsdsRed_Intensity_MinIntensity_CorrdsRed > 0.0937       | Cell objects with the minimum intensity across all their pixels in the dsRed channel > 0.0937                          |

The 50 rules identified by the user-trained automated algorithm as the strongest image-based correlates of the cobblestone area phenotype are shown for a representative screening run. Rules are based on features of cell “objects” (see Supplementary Fig. 1d and Methods), which individual cells are segmented into for classification. While all 50 rules contribute to the classification algorithm, the rules are rank-ordered with those given the most weight listed first. Detailed explanations are shown for the purposes of illustration only, as the exact 50 rules will vary by image batch (see Methods).

## Supplementary Table 2 | Small Molecule Screening Data

| Category                                 | Parameter                           | Description                                                                                                                                                                                                                                                                                                                                                              |
|------------------------------------------|-------------------------------------|--------------------------------------------------------------------------------------------------------------------------------------------------------------------------------------------------------------------------------------------------------------------------------------------------------------------------------------------------------------------------|
| Assay                                    | Type of assay                       | Cell-based co-culture assay                                                                                                                                                                                                                                                                                                                                              |
|                                          | Target                              | Leukemic Cobblestone Area-Forming Cells (CAFCs)                                                                                                                                                                                                                                                                                                                          |
|                                          | Primary measurement                 | Total CAFC area per well                                                                                                                                                                                                                                                                                                                                                 |
|                                          | Key reagents                        | Primary stem-enriched leukemia cells, Bone marrow stromal cells (OP9 cell line or primary bone marrow mesenchymal stromal cells), Image analysis software algorithms (see <a href="http://www.cellprofiler.org/published_pipelines.shtml">http://www.cellprofiler.org/published_pipelines.shtml</a> )                                                                    |
|                                          | Assay protocol                      | See Methods                                                                                                                                                                                                                                                                                                                                                              |
|                                          | Additional comments                 |                                                                                                                                                                                                                                                                                                                                                                          |
| Library                                  | Library size                        | 14,718 compounds screened                                                                                                                                                                                                                                                                                                                                                |
|                                          | Library composition                 | Compounds were selected from a series of chemically diverse commercially available and internally synthesized libraries, including ~1,920 known bioactive molecules, ~1,600 natural products, and 2,880 compounds generated via diversity oriented synthesis (DOS)                                                                                                       |
|                                          | Source                              | Broad Institute compound collection                                                                                                                                                                                                                                                                                                                                      |
|                                          | Additional comments                 |                                                                                                                                                                                                                                                                                                                                                                          |
| Screen                                   | Format                              | 384-well (Corning 3712)                                                                                                                                                                                                                                                                                                                                                  |
|                                          | Concentration(s) tested             | 5 $\mu$ M in 0.2% DMSO                                                                                                                                                                                                                                                                                                                                                   |
|                                          | Plate controls                      | Neutral control: DMSO carrier alone; Positive control: 10 $\mu$ M XK469, a topoisomerase II $\beta$ inhibitor                                                                                                                                                                                                                                                            |
|                                          | Reagent/ compound dispensing system | Automated: Multidrop Combi (Thermo Scientific) for reagents, CyBi-Well Vario (CyBio) for compounds                                                                                                                                                                                                                                                                       |
|                                          | Detection instrument and software   | Microscopy images captured using automated ImageXpress Micro (Molecular Devices; 10x total magnification; binning of 2); Images analyzed using CellProfiler software                                                                                                                                                                                                     |
|                                          | Assay validation/QC                 | Assay sensitivity and specificity for CAFCs were 86% and 87%, respectively. Retest rate was 71.5% in co-culture with OP9 stromal type (61.6% with primary bone marrow stromal cells); Additional retesting (Fig. 1e); Compounds previously known to have preferential activity against LSCs relative to HSPCs were recovered; Secondary assays                           |
|                                          | Correction factors                  | N/A                                                                                                                                                                                                                                                                                                                                                                      |
|                                          | Normalization                       | A two-point normalization of total CAFC area per well was performed for compound treatments on each plate using the mean of neutral control wells (set at 0% effect) and the mean of positive control wells (set at -100% effect) on that plate. Each experimental compound was thus represented as a percent effect on CAFC area per well within this normalized range. |
|                                          | Additional comments                 | All compounds were tested in duplicate                                                                                                                                                                                                                                                                                                                                   |
|                                          | Post-HTS analysis                   | Hit criteria                                                                                                                                                                                                                                                                                                                                                             |
| Hit rate                                 |                                     | 2.8%                                                                                                                                                                                                                                                                                                                                                                     |
| Additional assay(s)                      |                                     | Retesting (above); Secondary screening assays (Fig. 1e); Other secondary studies.                                                                                                                                                                                                                                                                                        |
| Confirmation of hit purity and structure |                                     | Compounds were repurchased and retested in secondary experiments and verified analytically.                                                                                                                                                                                                                                                                              |
| Additional comments                      |                                     |                                                                                                                                                                                                                                                                                                                                                                          |



Supplementary Table 3 | The 155 Prioritized Screening Hits

| # | Name and Source                 | Structure                                                                            | SMILES                                                                                              | O            |
|---|---------------------------------|--------------------------------------------------------------------------------------|-----------------------------------------------------------------------------------------------------|--------------|
| 1 | celastrol <sup>*</sup>          | 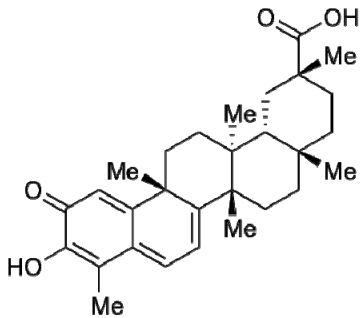    | <chem>OC(C(C=C1C2=CC=C3[C@]1(C[C@]4([C@@H]5C[C@@])(CC[C@@]5(CC[C@@]34C)C)(C(O)=O)C)C)=O)=C2C</chem> | CC10         |
| 2 | piperlongumine <sup>†</sup>     |     | <chem>O=C(C=C1CCN1)N1C(/C=C/C2=CC(OC)=C(C(OC)=C2)OC)=O</chem>                                       |              |
| 3 | 2-methoxyestradiol <sup>‡</sup> |    | <chem>O[C@@H]1[C@@]2(C)CC[C@]3([H])C(C=C4OC)=C(C=C4O)CC[C@@]3([H])[C@]2([H])CC1</chem>              |              |
| 4 | BRD7116 <sup>§</sup>            |  | <chem>O=C(NC1=CC=C(S(=O)(C2=CC=C(C(C=C2)NC(C3C(C3(C)C)(C)C)=O)=O)C=C1)C(C4(C)C)C4(C)C</chem>        | CC10;<br>SPT |
| 5 | lovastatin <sup>†</sup>         |   | <chem>CCC(C)C(=O)OC1CC(C)C=C2C=CC(C)C(CCC(O)CC(O)CC(=O)O)C12</chem>                                 | CC10         |
| 6 | parbendazole <sup>†</sup>       |   | <chem>O=C(OC)NC1=NC2=C(N1)C=CC(CCCC)=C2</chem>                                                      |              |

|    |                         |  |                                                                                                                         |      |
|----|-------------------------|--|-------------------------------------------------------------------------------------------------------------------------|------|
| 7  | methiazole <sup>†</sup> |  | <chem>O=C(NC1=NC2=C(C(N1)C=CC(SC(C)C)=C2)OC</chem>                                                                      |      |
| 8  | BRD1686 <sup>**</sup>   |  | <chem>O=C(C(OC1=CC=C(C=C1)OC)C)NC2=C(C=CC=C2)OCC</chem>                                                                 |      |
| 9  | BRD9608 <sup>a</sup>    |  | <chem>O=C(C1=CC=CC(NC(C2CCCCC2)=O)=C1O[C@@H]([C@@H](C3)C)CN(C)CC4=CC=C(C=C4)C(NC5=CC=CC=C5N)=O)N3[C@H](CO)C</chem>      |      |
| 10 | BRD6708 <sup>a</sup>    |  | <chem>O=C(C(C=CC=C1NC(NC2=CC=C(C=C2)=O)=C1O[C@@H]([C@@H](C3)C)CN(C)CC4=CC=C(C(NC5=CC=CC=C5N)=O)C=C4)N3[C@H](CO)C</chem> |      |
| 11 | BRD1319 <sup>††</sup>   |  | <chem>CC[N+]1=C(/C=C(C2)/C=C(CC2C)C)SC3=C1C=CC=C3</chem>                                                                | CC10 |
| 12 | BRD0638 <sup>††</sup>   |  | <chem>CC[N+]1=C(/C=C(C2)\C=C(CC2(C)C)C)OC3=C1C=CC=C3</chem>                                                             | CC10 |
| 13 | BRD1856 <sup>§</sup>    |  | <chem>O=C(C1=CC=CC=C1)C2=CC=[N+](CC3=NC=CC=C3)C=C2</chem>                                                               | CC10 |
| 14 | BRD6491 <sup>**</sup>   |  | <chem>O=C(C1=CC=C([N+](O-])=O)C=C1)NC2=CC=CC(OC(C)C(C3=CC=C(C=C3)OC)=O)=C2</chem>                                       | CC10 |

|    |                                    |                                                                                      |                                                                                                      |              |
|----|------------------------------------|--------------------------------------------------------------------------------------|------------------------------------------------------------------------------------------------------|--------------|
| 15 | BRD8404 <sup>‡‡</sup>              | 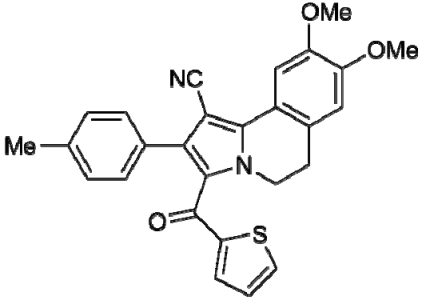    | <chem>O=C(C1=CC=CS1)C2=C(C3=CC=C(C=C3)C)C(C#N)=C(N2CC4)C5=C4C=C(C(OC)=C5)OC</chem>                   | CC10         |
| 16 | nitrendipine <sup>§§</sup>         |     | <chem>O=[N+]([O-])C1=CC=CC(C2C(C(OCC)=O)=C(C)NC(C)=C2C(O)C)=O=C1</chem>                              |              |
| 17 | BRD53501 <sup>**</sup>             |    | <chem>OC(CN1C(C=CC=C2)=C2N=C1C)COC(C=C3C(C)C)=C(C=C3)C</chem>                                        | CC5          |
| 18 | L-744,832 <sup>§§</sup>            |  | <chem>O=C(N[C@@H](C(OC(C)C)=O)C(CS(=O)(C)=O)[C@@H](CC1=CC=C(C=C1)OC[C@@H](NC[C@H](CS)N)C(C)CC</chem> |              |
| 19 | troglitazone <sup>***</sup>        |  | <chem>O=C(NC1=O)SC1CC(C=C2)=CC=C2OCC3(C)OC(C(C)=C4C)=C(C(C)=C4O)CC3</chem>                           | CC10;<br>SPT |
| 20 | Bax channel blocker <sup>†††</sup> |   | <chem>OC(CN1CCNCC1)CN2C(C=CC(Br)=C3)=C3C4=C2C=CC(Br)=C4</chem>                                       |              |

|    |                                           |                                                                                      |                                                                                                                                          |      |
|----|-------------------------------------------|--------------------------------------------------------------------------------------|------------------------------------------------------------------------------------------------------------------------------------------|------|
| 21 | BRD1059 <sup>‡‡</sup>                     | 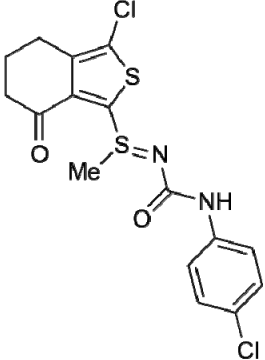    | <chem>C1C(C=C1)=CC=C1NC(=O)N=S(C2=C(C(CCC3)=O)C3=C(S2)Cl)C)=O</chem>                                                                     |      |
| 22 | BRD7506 <sup>‡</sup>                      |     | <chem>O=C1C[C@@]2(C)C(C[C@@](C(C(O3)=O)=C)([H])[C@H]3C2)C(C)=C1</chem>                                                                   |      |
| 23 | BRD3807 <sup>‡</sup>                      |    | <chem>O=C(C(CO)=C(C1)C)OC1[C@H]([C@H]2[C@@]3([C@](CC2)([H])[C@@]4([H])[C@]([C@]([C@]5(O6)[C@H]6C4)(C(C=C[C@H]5O)=O)C)([H])CC3)C)C</chem> |      |
| 24 | BRD0602 <sup>‡</sup>                      |   | <chem>OC[C@H](C([C@H]1C/C=C([C@H](CC/C(C)=C/CC/C(C)=C\C[C@@]12C)O)/C)=C(O)C2=O)C</chem>                                                  |      |
| 25 | BRD7359 <sup>**</sup>                     |   | <chem>O=[N+]([O-])C(C=C(C=C1)N(C(C(C2=CC=C(C=C2)N3C(C(C4CC5CC4)C5C3=O)=O)=O)=C1C</chem>                                                  | CC10 |
| 26 | pioglitazone hydrochloride <sup>†††</sup> |  | <chem>O=C(NC(S1)=O)C1CC2=CC=C(C=C2)OCCC(C=C3)=NC=C3CC</chem>                                                                             | SPT  |

|    |                           |                                                                                     |                                                                                                     |     |
|----|---------------------------|-------------------------------------------------------------------------------------|-----------------------------------------------------------------------------------------------------|-----|
| 27 | BRD6436*                  | 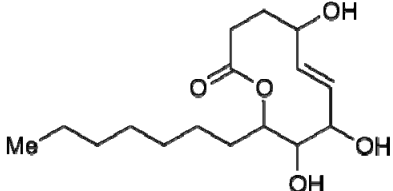   | <chem>O=C(CCC(/C=C/C(C1O)O)O)OC1CCCCC</chem>                                                        | CC5 |
| 28 | BRD6574**                 |    | <chem>OC(COC1=C(F)C=C(Br)C=C1F)CN2CCC(CC2)CN3C(C4=CC=CC5=C4C(C3=O)=CC=C5)=O</chem>                  |     |
| 29 | nimopidine <sup>SS</sup>  |    | <chem>O=[N+](O-)C1=CC=CC(C2C(C(OCCOC)=O)=C(C)NC(C)=C2C(OC(C)C)=O)=C1</chem>                         |     |
| 30 | trifluridine <sup>†</sup> |   | <chem>OC[C@@H]1[C@H](CC(O1)N2C(NC(C(C(F)(F)F)=C2)=O)=O)O</chem>                                     |     |
| 31 | BRD3636 <sup>‡</sup>      |  | <chem>O=C(/C1=C/CC[C@]2(O[C@@H]2[C@H]3OC(C([C@@H]3[C@H](C1OC(C)=O)OC(/C(C)=C/C)=C)=C)=O)C)OC</chem> |     |
| 32 | BRD4560 <sup>‡</sup>      |  | <chem>O=C1OCC(CC[C@@](O)([C@]([C@H]2[C@@H](C3OC(C)=O)(CC2(C)C)C)[C@H]3C)=C1</chem>                  |     |

|    |                                      |                                                                                      |                                                                                                                                |     |
|----|--------------------------------------|--------------------------------------------------------------------------------------|--------------------------------------------------------------------------------------------------------------------------------|-----|
| 33 | SKF-96365 <sup>SS</sup>              | 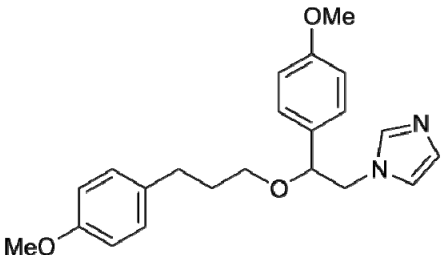    | <chem>COC1=CC=C(CCOC(CN2C=NC=C2)C3=CC=C(C=C3)OC)C=C1</chem>                                                                    |     |
| 34 | BRD3808 <sup>**</sup>                |     | <chem>O=C(N(C1=O)C2=C(N=C(N2C3=CC=C(C=C3)F)NCC(O)C4=CC=CC=C4)N1C</chem>                                                        | CC5 |
| 35 | vesamicol hydrochloride <sup>*</sup> |     | <chem>OC1C(CCCC1)N2CCC(CC2)C3=CC=CC=C3</chem>                                                                                  | CC5 |
| 36 | BRD0471 <sup>‡</sup>                 |    | <chem>O=C([C@@]([C@H]1C[C@@H]2C(C(/C=C\C1(C)C)O)=O)=C(O1)C)[C@@H]2OC(CC(C)C)=O</chem>                                          |     |
| 37 | BRD9886 <sup>**</sup>                |   | <chem>O=C(NC(C=CC=C1)=C1S2)C2CC(NC(C(OCC)=C3)=CC=C3[N+](O-))=O=O</chem>                                                        |     |
| 38 | rosiglitazone <sup>*</sup>           |   | <chem>O=C(NC(S1)=O)C1CC2=CC=C(C=C2)OCCN(C3=NC=CC=C3)C</chem>                                                                   |     |
| 39 | BRD2476 <sup>b</sup>                 |  | <chem>O=C(C(C=C(C=C1)NS(C2=CC=C(C=C2)(=O)=O)=C1O[C@H]([C@@H](C3)C)CN(C)CC4=CC=C(C(NC5=C(C=CC=C5)N)=O)C=C4)N3[C@@H](CO)C</chem> |     |



|    |                             |  |                                                                                                                                 |     |
|----|-----------------------------|--|---------------------------------------------------------------------------------------------------------------------------------|-----|
| 46 | BRD9912 <sup>c,e,g</sup>    |  | <chem>OC1=CC=C(Br)C=C1/C=N/NC(C2=CC=CC2O)=O</chem>                                                                              | CL5 |
| 47 | BRD8012 <sup>b</sup>        |  | <chem>O=C(N(C[C@@H]([C@@H](O)CN(C)CC2=CC=C(C=C2)C(NC3=C(N)C=CC=C3)=O)C)[C@H](C)CO)CC4=C1C=CC(NC(NC5=CC=C(C=C5)OC)=O)=C4</chem>  |     |
| 48 | BRD3408 <sup>c,e,g</sup>    |  | <chem>OC(C(OC)=C1)=CC(Br)=C1/C=N/NC(CCCCCC(N)O)=O=O</chem>                                                                      | CL5 |
| 49 | parthenolide <sup>†††</sup> |  | <chem>CC1=CCC[C@]2(C)O[C@@H]2[C@@H]3OC(=O)C(=C)[C@@H]3CC1</chem>                                                                | SPT |
| 50 | BRD4115 <sup>§</sup>        |  | <chem>FC1=CC=C(C=C1)CNC(C2=C(C=CC=C2)C(CC3=CC=CC=C3)=O)=O</chem>                                                                |     |
| 51 | BRD3999 <sup>a</sup>        |  | <chem>O=C(C1=CC=CC(NS(C2=CC=C(C=C2)C)(=O)=O)=C1O[C@@H]([C@@H](C3)C)CN(C)CC4=CC=C(C(NC5=C(C=CC=C5)N)=O)C=C4)N3[C@@H](CO)C</chem> |     |
| 52 | BRD1478 <sup>a</sup>        |  | <chem>O=C(C(C=CC=C1NC(C2=NC3=C(C=CC=C3)S2)=O)=C1O[C@@H]([C@@H](C4)C)CN(C)CC5=CC=C(C(NC6=CC=CC=C6N)=O)C=C5)N4[C@@H](CO)C</chem>  | SPT |



|    |                      |                                                                                      |                                                                                                                                  |     |
|----|----------------------|--------------------------------------------------------------------------------------|----------------------------------------------------------------------------------------------------------------------------------|-----|
| 53 | BRD0193 <sup>b</sup> | 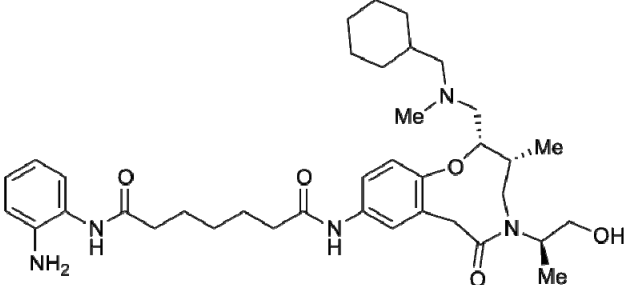   | <chem>O=C(CC(C=C(C=C1)NC(CCCCCC(NC2=CC=CC=C2N)=O)=O)=C1O[C@@H]([C@@H](C3)C)CN(C)CC4CCCC4)N3[C@@H](CO)C</chem>                    | CC5 |
| 54 | BRD9122 <sup>b</sup> |    | <chem>O=C(CC(C=C(C=C1)NC(NC2=CC(OCOC3)=C3C=C2)=O)=C1O[C@H]([C@H](C4)C)CN(C)CC5=CC=C(C(NC6=CC=CC=C6N)=O)C=C5)N4[C@@H](CO)C</chem> | CC5 |
| 55 | BRD6332 <sup>a</sup> |   | <chem>O=C(C1=CC=CC(N(C)C)=C1O[C@H]([C@H](C2)C)CN(C)CC3=CC=C(C(NC4=CC=CC=C4N)=O)C=C3)N2[C@@H](CO)C</chem>                         |     |
| 56 | BRD3719 <sup>b</sup> |  | <chem>O=C(C1=CC(NC(CCCCCC(NC2=C(N)C=CC=C2)=O)=O)=CC=C1O[C@@H]([C@@H](C3)C)CN(C)CC4=CC(OCOC5)=C5C=C4)N3C(CO)C</chem>              |     |
| 57 | BRD2023 <sup>b</sup> |  | <chem>O=C(CC(C=C(C=C1)NC(C2CCCCC2)=O)=C1O[C@H]([C@H](C3)C)CN(C)CC4=CC=C(C(NC5=CC=CC=C5)=O)N3[C@@H](CO)C</chem>                   | SPT |

|    |                          |  |                                                                                                                            |     |
|----|--------------------------|--|----------------------------------------------------------------------------------------------------------------------------|-----|
| 58 | BRD8170 <sup>b</sup>     |  | <chem>O=C(C1=CC(NC(C2CCCCC2)=O)=CC=C1O[C@H]([C@H](C3)C)CN(C)CC4=CC=C(C=C4)C(NC5=C(C=CC=C5)N)=O)N3[C@H](CO)C</chem>         |     |
| 59 | BRD9834 <sup>c,e,g</sup> |  | <chem>ClC1=C(OC)C(OC)=CC(Cl)=C1/C=N/NC(CCCCC(=O)NO)=O</chem>                                                               |     |
| 60 | BRD6819 <sup>b</sup>     |  | <chem>O=C(C1=CC(N(C)C)=CC=C1O[C@H]([C@H](C2)C)CN(C)CC3=CC=C(C(NC4=C(C=CC=C4)N)=O)C=C3)N2[C@@H](CO)C</chem>                 |     |
| 61 | BRD0350 <sup>c,e,g</sup> |  | <chem>BrC1=NC=CC=C1/C=N/NC(CCCCC(=O)OC)=O</chem>                                                                           |     |
| 62 | BRD6376 <sup>c,e,g</sup> |  | <chem>ONC(CCCCC(N)/N=C/C1=NC(C=CC=C2)=C2C=C1)=O</chem>                                                                     | CC5 |
| 63 | BRD1484 <sup>c,e,g</sup> |  | <chem>OC1=CC(/C=N/NC(CCCCC(N)C2=CC=CC=C2O)=O)=O=C(C=C1)O</chem>                                                            |     |
| 64 | BRD4247 <sup>c,e,g</sup> |  | <chem>ONC(CCCCC(N)/N=C/C(SC=C1)C=C1)=O</chem>                                                                              |     |
| 65 | BRD6258 <sup>a</sup>     |  | <chem>O=C(C(C=CC=C1NC(C2=CC(C)=NN2C)=O)=C1O[C@@H]([C@@H](C3)C)CN(C)CC4=CC=C(C(NC5=C(C=CC=C5)N)=O)C=C4)N3[C@@H](CO)C</chem> |     |

|    |                        |                                                                                     |                                                                                                                            |  |
|----|------------------------|-------------------------------------------------------------------------------------|----------------------------------------------------------------------------------------------------------------------------|--|
| 66 | BRD8008 <sup>‡</sup>   | 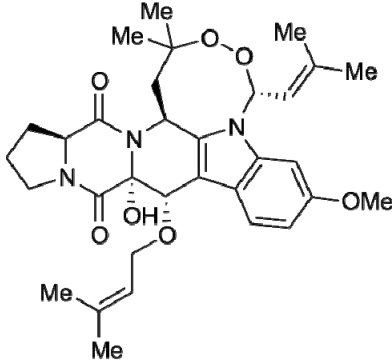   | <chem>O=C(N(CCC1)[C@@H]1C2=O)[C@](O)([C@H]3OC/C=C(C)/C)N2[C@@H]4C5=C3C(C=C6)=C(N5[C@H](OOC(C4)(C)C)/C=C(C)/C)C=C6OC</chem> |  |
| 67 | BRD0837 <sup>a</sup>   |   | <chem>O=C(C1=CC(NS(C2=CC=CC=C2)(=O)=O)=CC=C1O[C@@H]([C@H](C3C)CN(C)CC4=CC=C(C(NC5=C(C=CC=C5)N)=O)C=C4)N3[C@H](CO)C</chem>  |  |
| 68 | BRD2498 <sup>§§</sup>  |  | <chem>O=S(NCCN(CC1)CCC1CCC(C(C=C(C(N)=C2)CI)=C2OCC3=CC(OC)=CC(OC)=C3)=O)(C)=O</chem>                                       |  |
| 69 | RG-14620 <sup>§§</sup> |  | <chem>C1C=CC(Cl)=CC(/C=C(C#N)/C2=CC=CN=C2)=C1</chem>                                                                       |  |
| 70 | BRD8275 <sup>**</sup>  |  | <chem>C1C=CC(OCC(NC2=C(C(C)=C(S2)C)C(OCC)=O)=O)=CC=C1</chem>                                                               |  |

|    |                          |  |                                                                                                                                 |             |
|----|--------------------------|--|---------------------------------------------------------------------------------------------------------------------------------|-------------|
| 71 | BRD2736 <sup>b</sup>     |  | <chem>O=C(C1=CC(N(C)C)=CC=C1O[C@@H]([C@H](C2)C)CN(C)CC3=CC=C(C=C3)C(NC4=C(C=CC=C4)N)=O)N2[C@H](CO)C</chem>                      |             |
| 72 | BRD9456 <sup>a</sup>     |  | <chem>O=C(C1=CC=CC(NC2=NC=CN=C2)=O)=C1O[C@@H]([C@@H](C3)C)CN(C)CC4=CC=C(C(NC5=C(C=CC=C5)N)=O)C=C4)N3[C@H](CO)C</chem>           |             |
| 73 | BRD1177 <sup>†</sup>     |  | <chem>O=C(C=CCC1)N1C(CCC2=CC(OC)=C(C(OC)=C2)OC)=O</chem>                                                                        |             |
| 74 | BRD7475 <sup>b</sup>     |  | <chem>O=C(CC(C=C(C=C1)NS(C2=CC=C(C=C2)Cl))(=O)=O)=C1O[C@H]([C@H](C3)C)CN(C)CC4=CC=C(C=C4)C(NC5=CC=CC=C5N)=O)N3[C@H](CO)C</chem> |             |
| 75 | BRD4053 <sup>c,e,g</sup> |  | <chem>O=C(N/N=C/C1=NC(C=CC=C2)=C2C=C1)C3=NC=CC=C3</chem>                                                                        |             |
| 76 | SB-216641 <sup>ss</sup>  |  | <chem>O=C(C1=CC=C(C2=C(C)C=C(C3=NO(C)=N3)C=C2)C=C1)NC(C=C4OCCN(C)C)=CC=C4OC</chem>                                              | CC5;<br>SPT |

|    |                           |                                                                                      |                                                                                                                              |      |
|----|---------------------------|--------------------------------------------------------------------------------------|------------------------------------------------------------------------------------------------------------------------------|------|
| 77 | GF-109203X <sup>SS</sup>  | 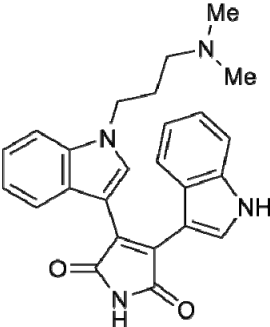    | <chem>O=C(N1)C(C2=C N(C3=C2C=CC=C3)CCCN(C)C)=C(C4=CNC5=C4 C=CC=C5)C1=O</chem>                                                | CC10 |
| 78 | BRD5418 <sup>b</sup>      |    | <chem>O=C(C1=CC(NC(NC2=CC=CC=C2)=O)=CC=C1O[C@@H]([C@@H](C3)C)CN(C)CC4=CC=C(C(NC5=C(C=CC=C5)N)=O)C=C4)N3[C@H](CO)C</chem>     |      |
| 79 | Azathioprine <sup>†</sup> |   | <chem>CN1C(SC2=NC=NC3=C2NC=N3)=C(N=C1)[N+](=[O-])=O</chem>                                                                   |      |
| 80 | BRD6790 <sup>a</sup>      |  | <chem>O=C(C(C=CC=C1)NS(C2=CC=CC=C2)(=O)=O)=C1O[C@@H]([C@@H](C3)C)CN(C)CC4=CC=C(C(NC5=C(C=CC=C5)N)=O)C=C4)N3[C@H](CO)C</chem> |      |

|    |                           |                                                                                      |                                                                                                                                    |  |
|----|---------------------------|--------------------------------------------------------------------------------------|------------------------------------------------------------------------------------------------------------------------------------|--|
| 81 | BRD2011 <sup>a</sup>      | 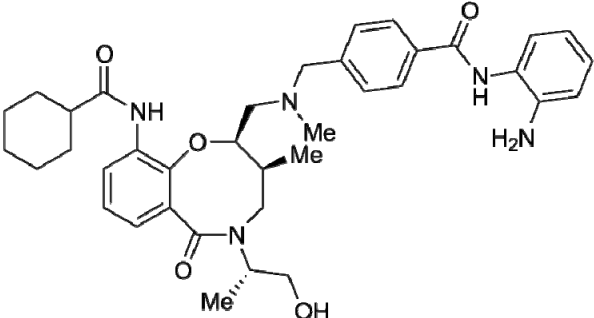   | <chem>O=C(C1=CC=CC(NC(C2CCCCC2)=O)=C1O[C@H]([C@H](C3)C)CN(C)CC4=CC=C(C(NC5=CC=CC=C5N)=O)C=C4)N3[C@H](CO)C</chem>                   |  |
| 82 | Tracazoloate <sup>†</sup> |     | <chem>O=C(OCC)C1=C(C(C=NN2CC)=C2N=C1C)NCCCC</chem>                                                                                 |  |
| 83 | BRD27137 <sup>b</sup>     |   | <chem>O=C(CC(C=C(C=C1)NC(NC2=CC=CC3=C2C=CC=C3)=O)=C1O[C@H]([C@H](C4)C)CN(C)CC5=CC=C(C=C5)C(NC6=C(N)C=CC=C6)=O)N4[C@@H](CO)C</chem> |  |
| 84 | BRD4586 <sup>b</sup>      |  | <chem>O=C(CC1=CC(N(C)C)=CC=C1O[C@H]([C@H](C2)C)CN(C)CC3=CC=C(C(NC4=C(N)C=CC=C4)=O)C=C3)N2[C@H](CO)C</chem>                         |  |
| 85 | BRD1684 <sup>c,e,g</sup>  |  | <chem>BrC(C=NC=C1)=C1/C=N/NC(CCC(CCC(NC2=CC=C(C=C2O)=O)=O)</chem>                                                                  |  |

|    |                        |                                                                                      |                                                                                                                                                                                          |  |
|----|------------------------|--------------------------------------------------------------------------------------|------------------------------------------------------------------------------------------------------------------------------------------------------------------------------------------|--|
| 86 | BRD3259 <sup>b</sup>   | 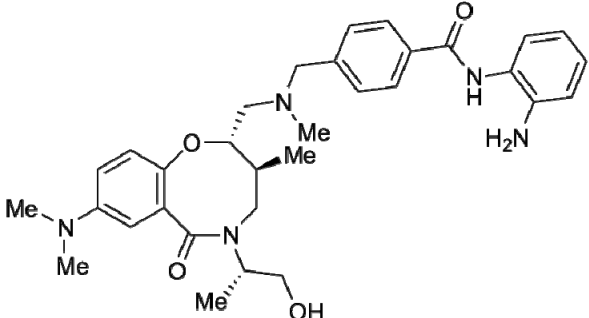   | <chem>O=C(C(C=C(C=C1)N(C)C)=C1O[C@@H]([C@H](C2)C)CN(C)CC3=CC=C(C(NC4=C(C=CC=C4)N)=O)C=C3)N2[C@H](CO)C</chem>                                                                             |  |
| 87 | Etoposide <sup>†</sup> |     | <chem>O=C(OC1)[C@]([C@@]1([H])[C@@H]2O[C@@H]3O[C@@]([C@H](C)O4)([H])[C@]4([H])[C@H](O)[C@H]3O)([H])[C@H](C5=CC(OC)=C(O)C(OC)=C5)C6=C2C=C(OC)O7)C7=C6</chem>                              |  |
| 88 | BRD1486 <sup>‡</sup>   |    | <chem>O[C@H]1[C@H](OC([C@H](C)[C@@H](C)C2=C3C=CC=N2=O)[C@@](O)(C)[C@@]4O[C@@]5(C)COC3=O)[C@H](OC(C)=O)[C@H]5[C@H](OC(C)=O)[C@@H](OC(C)=O)[C@@]4(CO)C(C)=O)[C@H]1OC(C6=CC=CC=C6)=O</chem> |  |
| 89 | BRD3119 <sup>a</sup>   |  | <chem>O=C(C1=CC=CC(NS(C2=C(ON=C2)C)(=O)=O)=C1O[C@@H]([C@@H](C3)C)CN(C)CC4=CC=C(C=C4)C(NC5=C(C=C=C5)N)=O)N3[C@H](CO)C</chem>                                                              |  |
| 90 | BRD1831 <sup>‡</sup>   |   | <chem>O[C@@H]([C@@H](O1)/C=C/C2=CC=CC=C2)C(OC)=CC1=O</chem>                                                                                                                              |  |

|    |                          |                                                                                      |                                                                                                                                   |      |
|----|--------------------------|--------------------------------------------------------------------------------------|-----------------------------------------------------------------------------------------------------------------------------------|------|
| 91 | BRD7355 <sup>††</sup>    | 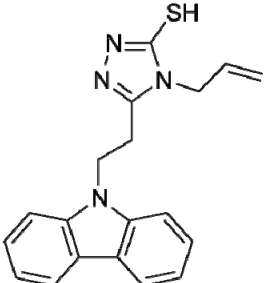    | <chem>SC1=NN=C(CCN2C(C=CC=C3)=C3C4=C2C=CC=C4)N1CC=C</chem>                                                                        |      |
| 92 | BRD9545 <sup>b</sup>     |    | <chem>O=C(CC(C=C(C=C1)NC(CCCCC(NC2=C(N)C=CC=C2)=O)=O)=O)C1O[C@H]([C@H](C3)C)CN(C)CC4CC4)N3[C@@H](CO)C</chem>                      |      |
| 93 | BRD33679 <sup>b</sup>    |   | <chem>O=C(CC1=CC(NS(C2=CC=CS2)=O)=O)=CC=C1O[C@H]([C@H](C3)C)CN(C)CC4=CC=C(C=C4)C(NC5=C(N)C=CC=C5)=O)N3[C@@H](CO)C</chem>          |      |
| 94 | BRD7348 <sup>c,e,g</sup> |  | <chem>ONC(CCCCCC(N/N=C/C1=CC=CC(Br)=C1)=O)=O</chem>                                                                               |      |
| 95 | BRD8827 <sup>**</sup>    |   | <chem>O=C(N(C(N1C)=O)C)C2=C1N=C(NCC3=CC=CO3)N2CC4=CC=CC=C4C</chem>                                                                | CC10 |
| 96 | BRD1859 <sup>a</sup>     |  | <chem>O=C(C1=CC=CC(NS(C2=CC=C(C1)C=C2)(=O)=O)=O)C1O[C@@H]([C@@H](C3)C)CN(C)CC4=CC=C(C=C4)C(NC5=C(C=CC=C5)N)=O)N3[C@H](CO)C</chem> |      |



|     |                                    |                                                                                      |                                                                                                                                    |  |
|-----|------------------------------------|--------------------------------------------------------------------------------------|------------------------------------------------------------------------------------------------------------------------------------|--|
| 97  | dexamethasone acetate <sup>†</sup> | 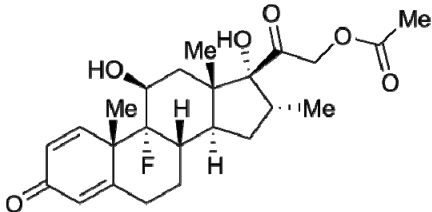    | <chem>O=C(C)OCC([C@](O)([C@@]1([C@@]2([H])[C@]3([H])[C@@](F)([C@](C(CC3)=CC4=O)(C=C4)C)[C@@H](O)C1)C)[C@@H](C2)C)=O</chem>         |  |
| 98  | BRD4339 <sup>b</sup>               |    | <chem>O=C(C1=CC(NC(=NC2=CC=CC3=C2C=CC=C3)=O)=CC=C1O[C@@H]([C@@H](C4)C)CN(C)CC5=CC=C(C(NC6=C(C=C(C=C6)N)=O)C=C5)N4[C@H](CO)C</chem> |  |
| 99  | BRD5229 <sup>b</sup>               |   | <chem>O=C(CC1=CC(NS(=O)(=O)C2=CC=C(C=C2)F)(=O)=O)C=C1O[C@@H]([C@@H](C3)C)CN(C)CC4=CC=C(C(NC5=C(N)C=CC(=O)C=C5)N3[C@H](CO)C</chem>  |  |
| 100 | BRD0010 <sup>b</sup>               |  | <chem>O=C(C1=CC(NC(=NC2=CC=CC=C2)=O)=CC=C1O[C@@H]([C@@H](C3)C)CN(C)CC4=CC=C(C=C4)C(NC5=C(C=CC=C5)N)=O)N3[C@@H](CO)C</chem>         |  |
| 101 | BRD6218 <sup>c,e,g</sup>           |   | <chem>[O-][N+]1=CC=C(C=C1)/C=N/NC2=NC=CC=C2=O</chem>                                                                               |  |

|     |                       |                                                                                      |                                                                                                                         |  |
|-----|-----------------------|--------------------------------------------------------------------------------------|-------------------------------------------------------------------------------------------------------------------------|--|
| 102 | BRD8430 <sup>b</sup>  | 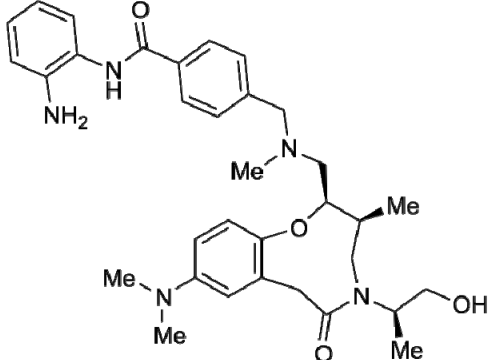   | <chem>O=C(CC(C=C(C=C1)N(C)C)=C1O[C@H]([C@H](C2)C)CN(C)CC3=C=C(C(NC4=C(N)C=CC=C4)=O)C=C3)N2[C@@H](CO)C</chem>            |  |
| 103 | BRD3521 <sup>a</sup>  |    | <chem>O=C(C(C=CC=C1NC(C2=CC=NC=C2)=O)=C1O[C@@H]([C@@H](C3)C)CN(C)CC4=CC=C(C(NC5=C(C=CC=C5)N)=O)C=C4)N3[C@H](CO)C</chem> |  |
| 104 | BRD1413 <sup>d</sup>  |   | <chem>OCCCCO1=CC=C(C(C2=N[C@](C(N3CCOCC3)=O)(CC4=CC=CC=C4)CN=[N+]=[N-])CO2)C=C1</chem>                                  |  |
| 105 | BRD5757 <sup>a</sup>  |  | <chem>O=C(C(C=CC=C1N(C)C)=C1O[C@@H]([C@@H](C2)C)CN(C)CC3=CC=C(C(NC4=CC=CC=C4N)=O)C=C3)N2[C@H](CO)C</chem>               |  |
| 106 | BRD0257 <sup>**</sup> |   | <chem>C1(CCN2C(N=C(N=N3)SCC4=CC5=NON=C5C=C4)=C3C6=C2C=C(C=C6)=CC=CC=C1</chem>                                           |  |

|     |                           |                                                                                      |                                                                                                                                   |      |
|-----|---------------------------|--------------------------------------------------------------------------------------|-----------------------------------------------------------------------------------------------------------------------------------|------|
| 107 | BRD6992 <sup>a</sup>      | 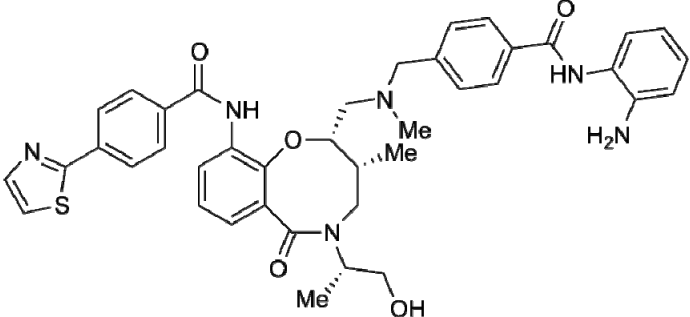   | <chem>O=C(C1=CC=CC(NC(C2=CC=C(C=C2)C3=NC=CS3)=O)=C1O[C@@H]([C@@H](C4)C)CN(C)CC5=CC=C(C(NC6=C(C=CC=C6N)=O)C=C5)N4[C@H](CO)C</chem> | SPT  |
| 108 | BRD6975 <sup>b</sup>      |    | <chem>O=C(C1=CC(NC(NC2=CC=C(C=C2)F)=O)=CC=C1O[C@@H]([C@@H](C3)C)CN(C)CC4=CC=C(C(NC5=C(C=CC=C5)N)=O)C=C4)N3[C@@H](CO)C</chem>      |      |
| 109 | BRD58870 <sup>e</sup>     |    | <chem>O=C(N([C@H]1C2=CC=C(CO)C=C2)CC3(C4)C[C@@H](C[C@@H]4C5)C[C@@H]5C3)C6=C(C=CC=C6)[C@H]1C(NC(C=C7)=CC=C7OC)=O</chem>            |      |
| 110 | NSC 119889 <sup>§§§</sup> |   | <chem>OC(C1=C(C(Br)=C(C(Br)=C1Br)Br)C2=C(C=C3)C(OC4=C2C=CC(O)=C4)=CC3=O)=O</chem>                                                 | CC10 |
| 111 | BRD9907 <sup>a</sup>      |  | <chem>O=C(N(C[C@H]([C@H](O1)CN(C)CC2=CC=C(C(NC3=C(C=CC=C3)N)=O)C=C2)C)[C@@H](C)CO)C4=C1C(NC(NC(C=C5)=CC=C5OC)=O)=CC=C4</chem>     |      |

|     |                       |                                                                                      |                                                                                                                               |      |
|-----|-----------------------|--------------------------------------------------------------------------------------|-------------------------------------------------------------------------------------------------------------------------------|------|
| 112 | BRD5081 <sup>b</sup>  | 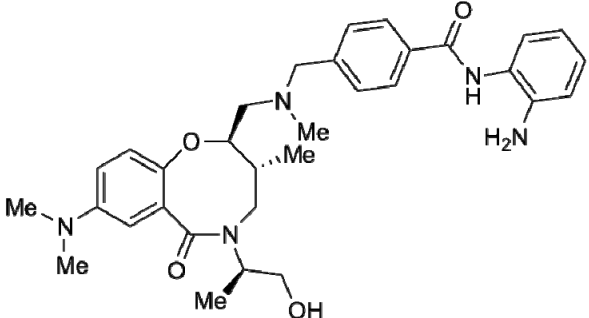   | <chem>O=C(C1=CC(N(C)C)=CC=C1O[C@@H]([C@@H](C2)C)CN(C)CC3=CC=C(C(NC4=C(C=CC=C4)N)=O)C=C3)N2[C@@H](CO)C</chem>                  | CC5  |
| 113 | BRD31108 <sup>b</sup> |    | <chem>O=C(CC(C=C(C=C1)NC(NC2=CC=C(C=C2)F)=O)=C1O[C@H]([C@H](C3)C)CN(C)C4=CC=C(C=C4)C(NC5=C(N)C=C(C=C5)=O)N3[C@@H](CO)C</chem> | CC10 |
| 114 | BRD0508 <sup>a</sup>  |   | <chem>O=C1C2=CC=C(C(NC(NC3=CC=C(C=C3)OC)=O)=C2O[C@H](CN(C)CC4=CC=C(C(NC5=C(C=CC=C5)N)=O)C=C4)[C@@H](C)CN1[C@@H](C)CO</chem>   |      |
| 115 | BRD9652 <sup>a</sup>  |  | <chem>O=C(C(C=CC=C1NC(C2CC2)=O)=C1O[C@@H]([C@@H](C3)C)CN(C)CC4=CC=C(C(NC5=C(C=CC=C5)N)=O)C=C4)N3[C@H](CO)C</chem>             |      |
| 116 | BRD6350 <sup>b</sup>  |  | <chem>O=C(CC(C=C(C=C1)NC(CC2=CC=CC=C2)=O)=C1O[C@H]([C@H](C3)C)CN(C)CC4=CC=C(C(NC5=C(C=CC=C5)N)=O)C=C4)N3[C@@H](CO)C</chem>    |      |

|     |                                  |  |                                                                                                                           |  |
|-----|----------------------------------|--|---------------------------------------------------------------------------------------------------------------------------|--|
| 117 | BRD0983 <sup>a</sup>             |  | <chem>O=C(C(C=CC=C1NC(C2CCCCC2)=O)=C1O[C@H]([C@H](C3)C)CN(C)CC4=CC=C(C=C4)C(NC5=C(C=CC=C5)N)=O)N3[C@@H](CO)C</chem>       |  |
| 118 | BRD8258 <sup>c,e,g</sup>         |  | <chem>BrC(N=CC=C1)=C1/C=N/NC(CCC(CCC(NC2=C(O)C=CC=C2)=O)=O</chem>                                                         |  |
| 119 | BRD2553 <sup>c,e,g</sup>         |  | <chem>ONC(CCCCC(N/N=C/C1=CC2=C(C=C1)C(C=CC=C3)=C3C2)=O)=O</chem>                                                          |  |
| 120 | tryphostin AG-1478 <sup>ss</sup> |  | <chem>C1C=CC(NC2=NC=NC3=C2C=C(OC)C(OC)=C3)=CC=C1</chem>                                                                   |  |
| 121 | BRD1698 <sup>c,e,g</sup>         |  | <chem>ONC(CCCCC(N/N=C/C(SC=C1)=C1C)=O)=O</chem>                                                                           |  |
| 122 | BRD6717 <sup>‡</sup>             |  | <chem>O=C(C[C@@H]1[C@H]2[C@@H]3[C@H](C(C(O3)=O)=C)[C@@H](OC(C(CO)=C)=O)CC1=C)[C@@H]2C</chem>                              |  |
| 123 | BRD3438 <sup>b</sup>             |  | <chem>O=C(CC1=CC(NS(C2=CC=CS2)(=O)=O)=CC=C1O[C@H]([C@H](C3)C)CN(C)CC4=CC=C(C=C4)C(NC5=C(N)C=CC=C5)=O)N3[C@@H](CO)C</chem> |  |

|     |                          |  |                                                                                                                                |      |
|-----|--------------------------|--|--------------------------------------------------------------------------------------------------------------------------------|------|
| 124 | BRD4729 <sup>b</sup>     |  | <chem>O=C(CC(C=C(C=C1)NC(C2=CC=NC=C2)=O)=C1O[C@H]([C@H](C3)C)CN(C)CC4=CC=C(C=C4)C(NC5=C(N)C=CC=C5)=O)N3[C@@H](CO)C</chem>      |      |
| 125 | BRD1581 <sup>c,e,g</sup> |  | <chem>OC1=CC=CC(/C=N/NC(C2=CC=CC=C2O)=O)=C1O</chem>                                                                            | CL10 |
| 126 | BRD5099 <sup>b</sup>     |  | <chem>O=C(C1=CC(NS(C2=CC=C(C)C=C2)(=O)=O)=CC=C1O[C@@H]([C@@H](C3)C)CN(C)CC4=CC=C(C(NC5=C(C=CC=C5)N)=O)C=C4)N3[C@H](CO)C</chem> |      |
| 127 | BRD8711 <sup>b</sup>     |  | <chem>O=C(CC(C=C(C=C1)NC(CCCCCC(NC2=C(N)C=CC=C2)=O)=O)=C1O[C@@@H]([C@@@H](C3)C)CN(C)CC4CCCCC4)N3[C@H](CO)C</chem>              |      |
| 128 | BRD4192 <sup>**</sup>    |  | <chem>OC1=CC=NC(SCC(=O)Nc2ccc(Oc3ccccc3)cc2)=C1O</chem>                                                                        |      |
| 129 | BRD6276 <sup>c,e,g</sup> |  | <chem>O=C(C1=CC=CC=C1O)N/N=C/C2=CC=CC=C2C=C3)C</chem>                                                                          |      |

|     |                      |                                                                                      |                                                                                                                           |  |
|-----|----------------------|--------------------------------------------------------------------------------------|---------------------------------------------------------------------------------------------------------------------------|--|
| 130 | BRD7016 <sup>f</sup> | 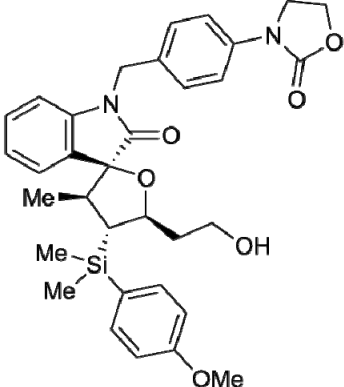    | <chem>O=C(OCC1)N1C(C=C2)=CC=C2CN(C3=O)C4=C(C=CC=C4)[C@@]3(O[C@H]5CCO)[C@H](C)[C@H]5[Si](C)(C)C6=CC=C(C=C6)OC</chem>       |  |
| 131 | BRD7283 <sup>b</sup> |    | <chem>O=C(N(C[C@@H]([C@@H](O1)CN(C)CC2=CC=C(C=C2)C(NC3=C(N)C=CC=C3)=O)[C@H](C)CO)CC4=C1C=CC(NC(NC(C)C)=O)=C4</chem>       |  |
| 132 | BRD1933 <sup>‡</sup> |    | <chem>OC(C1=CC=CC=C1)(CC2=CC=CN=C2)C3=CC=C=C3</chem>                                                                      |  |
| 133 | BRD7942 <sup>b</sup> |  | <chem>O=C(C1=CC(NC(CCC(F)(F)F)=O)=CC=C1O[C@@H]([C@H](C2)C)CN(C)CC3=CC=C(C(C(NC4=C(C=C(C=C4)N)=O)C=C3)N2[C@@H](CO)C</chem> |  |
| 134 | BRD3137 <sup>‡</sup> |   | <chem>C/C=C(/C)C(=O)O[C@H]1C[C@@H]2[C@H](OC(=O)C2=C)[C@@H]3O[C@]3(C)C(C)C=C1C</chem>                                      |  |

|     |                          |  |                                                                                                                                     |      |
|-----|--------------------------|--|-------------------------------------------------------------------------------------------------------------------------------------|------|
| 135 | Suxibuzone <sup>†</sup>  |  | <chem>O=C(N(N(C1=O)C2=CC=CC=C2)C3=CC=CC=C3)C1(COC(CCC(O)=O)=O)CCCC</chem>                                                           |      |
| 136 | BRD3661 <sup>b</sup>     |  | <chem>O=C(CC(C=C(C=C1)NC(CC2=CN(C)C3=C2C=CC=C3)=O)=C1O[C@H]([C@H](C4)C)CN(C)CC5=CC=C(C(NC6=C(N)C=CC=C6)=O)C=C5)N4[C@@H](CO)C</chem> |      |
| 137 | BRD2745 <sup>b</sup>     |  | <chem>O=C(C1=CC(NS(C2=CC=CS2)=O)=O)=CC=C1O[C@@H]([C@@H](C3)C)CN(C)CC4=CC=C(C(NC5=C(C=CC=C5)N)=O)C=C4)N3[C@H](CO)C</chem>            | CL5  |
| 138 | BRD3842 <sup>**</sup>    |  | <chem>C1C=C(C=CC=C1)N2C(C(C=CC3)=C3N=C2CS4=NC=NC5=C4N=CN5)=O</chem>                                                                 |      |
| 139 | BRD0122 <sup>c,e,g</sup> |  | <chem>ONC(CCCCCC(N/N=C/C1=CC=C(O)C2=C1C=C(C=C2)=O)=O</chem>                                                                         | CL5  |
| 140 | BRD8422 <sup>c,e,g</sup> |  | <chem>O=C(N/N=C/C1=NC(C=CC=C2)=C2C=C1)CCCCC(NC3=CC=CC=C3O)=O</chem>                                                                 | CC10 |



|     |                              |  |                                                                                                                          |     |
|-----|------------------------------|--|--------------------------------------------------------------------------------------------------------------------------|-----|
| 141 | BRD9825 <sup>b</sup>         |  | <chem>O=C(C1=CC(NC(C2=CC=NC=C2)=O)=CC=C1O[C@@H]([C@@H](C3)C)CN(C)CC4=CC=C(C=C4)C(NC5=C(C=CC=C5)N)=O)N3[C@@H](CO)C</chem> |     |
| 142 | wortmannin <sup>ss</sup>     |  | <chem>O=C(O1)C2=CO C(C(C3=C4[C@@H](C[C@]5([C@@H]3)CCC5=O)C)OC(C)=O)=C2[C@]4(C)[C@H]1COC</chem>                           | CC5 |
| 143 | pyrimethamine <sup>†</sup>   |  | <chem>C1C(C=C1)=CC=C1C(C(N)=NC(N)=N2)=C2CC</chem>                                                                        |     |
| 144 | tranylcypromine <sup>†</sup> |  | <chem>N[C@@H]1[C@H](C1)C2=CC=C C=C2</chem>                                                                               |     |
| 145 | BRD0686 <sup>c,e,g</sup>     |  | <chem>C1C(N=CC=C1)=C1/C=N/NC(CCC(CCC(NC2=CC=C(C=C2O)=O)=O</chem>                                                         |     |
| 146 | BRD8085 <sup>**</sup>        |  | <chem>O=C(CC1=CC=C(C=C1)NC(N=C(N=C2)C3=CC=C(Cl)C=C3)=C2C(C)=O</chem>                                                     |     |
| 147 | BRD4355 <sup>c,e,g</sup>     |  | <chem>OC1=C(C=CC=C1)C(N/N=C/C2=C(C(C=CC=C3)=C3C=C2)O)=O</chem>                                                           |     |

|     |                        |                                                                                                                                   |                                                                                                                                |  |
|-----|------------------------|-----------------------------------------------------------------------------------------------------------------------------------|--------------------------------------------------------------------------------------------------------------------------------|--|
| 148 | BRD4488 <sup>b</sup>   | 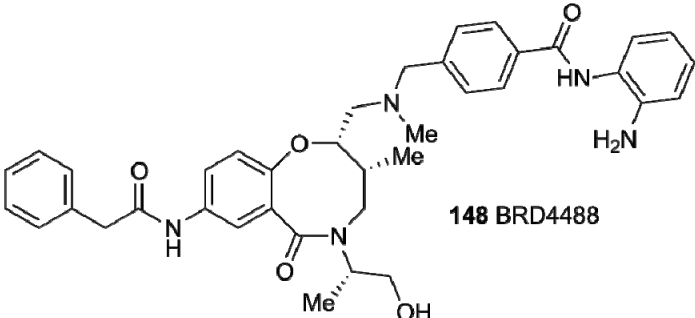 <p style="text-align: center;">148 BRD4488</p> | <chem>O=C(C1=CC(NC(C2=CC=CC=C2)=O)=CC=C1O[C@@H]([C@@H](C3)C)CN(C)CC4=CC=C(C(NC5=C(C=CC=C5)N)=O)C=C4)N3[C@H](CO)C</chem>        |  |
| 149 | BRD4081 <sup>††</sup>  |                                                  | <chem>O=C(N1C(C=CC=C2)=C2SC3=C1C=CC=C3)NC(C)(C)C</chem>                                                                        |  |
| 150 | cotinine <sup>†</sup>  |                                                  | <chem>O=C(CC[C@H]1C2=CC=CN=C2)N1C</chem>                                                                                       |  |
| 151 | BRD5036 <sup>a</sup>   |                                                | <chem>O=C(C1=CC=CC(N(C)C)=C1O[C@@H]([C@@H](C2)C)CN(C)CC3=CC=C(C(NC4=C(C=CC=C4)N)=O)C=C3)N2[C@H](CO)C</chem>                    |  |
| 152 | SU 9516 <sup>§§§</sup> |                                                | <chem>O=C(N1)/C(C2=C1C=CC(OC)=C2)=C\C3=CNC=N3</chem>                                                                           |  |
| 153 | BRD7637 <sup>a</sup>   |                                               | <chem>O=C(C1=CC=CC(NS(C2=CC=C(F)C=C2)(=O)=O)=C1O[C@@H]([C@@H](C3)C)CN(C)CC4=CC=C(C(NC5=C(C=CC=C5)N)=O)C=C4)N3[C@H](CO)C</chem> |  |

|     |                          |                                                                                   |                                                               |      |
|-----|--------------------------|-----------------------------------------------------------------------------------|---------------------------------------------------------------|------|
| 154 | quercetin <sup>†</sup>   | 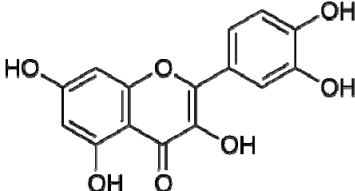 | <chem>OC1=CC2=C(C(O)=C1)C(C(O)=C(O2)C3=CC=C(C(O)=C3)=O</chem> |      |
| 155 | BRD6379 <sup>c,e,g</sup> |  | <chem>OC1=CC(OC)=CC=C1/C=C/N/NC(C2=C(C=CC=C2)O)=O</chem>      | CL10 |

\* MicroSource Discovery Systems, Inc.

† Prestwick Chemical

‡ Analyticon

§ TimTec

\*\* ChemBridge

†† ChemDiv

‡‡ Maybridge

§§ Biomol

\*\*\* Sigma

‡‡‡ MPBio

§§§ CalBioChem

<sup>a</sup> Chou, D.H. et al. Synthesis of a novel suppressor of beta-cell apoptosis via diversity-oriented synthesis. *ACS Med Chem Lett* **2**, 698-702 (2011).

<sup>b</sup> Marcaurelle, L.A. et al. An aldol-based build/couple/pair strategy for the synthesis of medium- and large-sized rings; discovery of macrocyclic histone deacetylase inhibitors. *J Am Chem Soc* **132**, 16962-76 (2010).

<sup>c</sup> <http://chembank.broadinstitute.org/chemistry/search/execute.htm?id=5685018>

<sup>d</sup> Mitchell, J.M. & Shaw, J.T. A Structurally diverse library of polycyclic lactams resulting from systematic placement of proximal functional groups. *Angew Chem Int Ed Engl* **45**, 1722-6 (2006).

<sup>e</sup> Vegas, A.J. et al. Fluorous-based small-molecule microarrays for the discovery of histone deacetylase inhibitors. *Angew. Chem., Int. Ed.*, **46**, 7960-4 (2007).

<sup>f</sup> Franz, A.K., Dreyfuss, P.D. Schreiber, S.L. Synthesis and cellular profiling of diverse organosilicon small molecule. *J Am Chem Soc* **129**, 1020-1 (2007).

<sup>g</sup> Tang, W., Luo T., Greenberg, E.F., Bradner, J.E. & Schreiber, S.L. Discovery of histone deacetylase & selective inhibitors. *Bioorg Med Chem Lett* **21**, 2601-5 (2011).

○ Hits showing stromal pretreatment effects for LSCe cells cultured with OP9 stroma are noted (SPT), as are compounds that displayed ten-fold or five-fold greater potency against LSCe cells in co-culture relative to hAML cell lines (CC10, CC5, respectively; see Methods). Compounds that displayed ten-fold or five-fold greater potency against the hAML cell lines relative to LSCe cells in co-culture are also noted (CL10, CL5, respectively).

**Supplementary Table 4 | Representative raw data for human CAFC assays**

| Lovastatin    | AML 3               | AML 6                | Normal              |
|---------------|---------------------|----------------------|---------------------|
| 0 (DMSO)      | <b>16/16</b> (100%) | <b>23/24</b> (95.8%) | <b>24/24</b> (100%) |
| 0.125 $\mu$ M | <b>6/6</b> (100%)   | <b>5/6</b> (83.3%)   | <b>6/6</b> (100%)   |
| 0.25 $\mu$ M  | <b>6/12</b> (50%)   | <b>6/12</b> (50%)    | <b>12/12</b> (100%) |
| 0.5 $\mu$ M   | <b>5/12</b> (41.7%) | <b>4/12</b> (33.3%)  | <b>12/12</b> (100%) |
| 0.75 $\mu$ M  | <b>3/12</b> (25%)   | <b>3/12</b> (25%)    | <b>12/12</b> (100%) |
| 1 $\mu$ M     | <b>1/6</b> (16.7%)  | <b>0/6</b> (0%)      | <b>6/6</b> (100%)   |
| 2 $\mu$ M     | <b>0/6</b> (0%)     | <b>0/6</b> (0%)      | <b>6/6</b> (100%)   |

The data is shown as the ratio of the number of replicate wells positive for cobblestone areas relative to the total number of replicates.

**Supplementary Table 5 | EC<sub>50</sub> values for additional statins in co-culture with BMSC stromal cells**

| Statin       | LSCe EC <sub>50</sub> (nM) | HSPC EC <sub>50</sub> (nM) |
|--------------|----------------------------|----------------------------|
| Cerivastatin | < 10                       | > 20,000                   |
| Simvastatin  | 15                         | > 20,000                   |
| Fluvastatin  | 28                         | > 20,000                   |
| Rosuvastatin | 1,200                      | > 20,000                   |
| Atorvastatin | 1,900                      | > 20,000                   |

**Supplementary Table 6 | Number of different shRNAs depleted by 20-fold relative to control shRNAs during *in vivo* leukemogenesis**

| <b>Gene</b>    | <b># shRNAs scoring</b> |
|----------------|-------------------------|
| <i>Hmgcr</i>   | 3                       |
| <i>Fnta</i>    | 2                       |
| <i>lcmt</i>    | 2                       |
| <i>Fdft1</i>   | 1                       |
| <i>Rabggtb</i> | 1                       |
| <i>Fdps</i>    | 1                       |
| <i>Pggt1b</i>  | 0                       |
| <i>Rabggta</i> | 0                       |

**Supplementary Note 1 | High-Throughput Co-Culture Assay Methods**

**LSCe Co-culture Screen.** Liquid dispensing was performed using an automated liquid dispenser (Multidrop Combi) or a multichannel pipettor, and liquid removal was performed with a Microplate washer (ELx405, BioTek) or 24-channel wand aspirator (VP186L, V and P Scientific). In 384-well plates (3712, Corning), wells were coated with 10  $\mu$ l of 0.1% gelatin (ES006B, Chemicon International), incubated for 15 minutes, then washed with PBS. 6,750 OP9 cells in 50  $\mu$ l of OP9 media were then added to each well with time spent in suspension at plating kept to a minimum for these cells. All incubation steps included the addition of a breathable plate cover (B90112, VWR) to avoid evaporation. After 24 hours of incubation at 37°C/ 5% CO<sub>2</sub>, the media was aspirated and 300 freshly isolated LSCe cells were added to each well in 50  $\mu$ l of 50% OP9 media (pre-conditioned on OP9 cells for 3 days), and 50% co-culture media (500 ml DMEM (11965-092, Gibco), 10% Horse Serum (26050-088, Gibco), 1:100 Hydrocortisone (07904, StemCell Technologies), 2.5 ml Beta-mercaptoethanol (ES-007-E, Chemicon International), 10% FBS (10082-147, Gibco) and 1% Pen-Strep). After a 24 hour incubation, the plates were briefly centrifuged for 30 seconds (60 x gravity, slow braking) and 100 nl of test compounds in dimethyl sulfoxide (DMSO), DMSO alone, or XK469 (X3628, Sigma) were pin transferred

to a final concentration of 5  $\mu$ M in 0.2% DMSO and the plates were re-incubated for 3 days. The media was aspirated, 50  $\mu$ l of fresh media (the same 50/50 media mix added at LSCe cell plating) was added and 100 nl of compound was again added to the appropriate wells. Plates were returned to incubator for 2 days then imaged at 10x total magnification in the dsRed and GFP channels.

**HSPC Co-Culture Screen.** 2,000 Primary murine BMSCs were plated in 30 $\mu$ L per well in 384-well plates (3712, Corning) pretreated with fibronectin (20  $\mu$ g/mL fibronectin (Millipore) for 30 minutes at 37°C). Breathable plate covers were added and plates were spun at approximately 60 x gravity, incubated at room temperature for 60-90 minutes then kept at 33°C/ 5% CO<sub>2</sub> for 3 days. Murine HSPCs were plated in phenol-red free alpha-MEM with 20% FBS (20  $\mu$ L containing 200 cells per well) and incubated at 33°C/ 5% CO<sub>2</sub> overnight, after which 100 nl of test compounds in DMSO, or control compounds were pin transferred to a final concentration of 20  $\mu$ M in 0.2% DMSO. The plates were then incubated at 33°C/ 5% CO<sub>2</sub> for 6 days. The co-cultures were imaged using dsRed and GFP filters at 4x total magnification. The total number of HSPCs per well was quantified using CellProfiler software.

**Quantification of Cobblestone Areas.** An image analysis pipeline comprised of multiple algorithms for CAFC quantification was developed using CellProfiler<sup>25</sup> software ([http://www.cellprofiler.org/published\\_pipelines.shtml](http://www.cellprofiler.org/published_pipelines.shtml)). First, each of the nine dsRed images capture per well at 10x magnification was processed by masking the well boundary and correcting for illumination variation (a consequence of optical hardware irregularities, illumination patterns, or shading). Next, each individual dsRed-positive region (LSCe cells) was segmented within the well into one or more subcellular areas termed cell “objects” (see Supplementary Fig. 1d). Each object was then assessed for hundreds of characteristics including intensity, area, shape, object neighbors, and texture. These per-object measurements served as input to guide a biologist-supervised machine learning routine in the classification of CAFC versus non-CAFC objects. A gentle boosting classifier<sup>26</sup> was iteratively trained to learn rules to distinguish between the two phenotypes. Every object in every image of a given image set was then scored as either CAFC or non-CAFC using the set of 50 measurement rules returned from

the classifier. Each of nine sites imaged per well was analyzed independently, and the image processing was parallelized. The measurements were automatically merged and stored in a MySQL database (Oracle, Inc.). As cell objects did not correspond 1:1 to the number of cells, 'total cobblestone area per well' was used as a suitable proxy for total CAFC count per well. To determine the sensitivity and specificity of the pipeline, sets of more than 100 representative objects were presented to expert biologists for direct, manual classification. The biologists' classification was compared to the classification determined by the machine learning routine. The full confusion matrix for a representative example was as follows: True positives (i.e. True CAFC) = 36, True negatives (i.e. False CAFC) = 88, False positives (i.e. True nonCAFC) = 14, False negatives (i.e. False non-CAFC) = 5.

**Filtering and Retest.** 415 compounds scored in the LSCe primary screen. Of these, compounds that decreased total HSPC number by greater than 80% in both replicates relative to DMSO controls (Stewart, A.L., Scadden, D.T., et al., in preparation) or that overtly killed stromal cells in the primary HSPC screen were excluded, yielding 270 compounds. 240 of these were retested on LSCe cells co-cultured with OP9 stroma (8 concentrations per compound) and with BMSCs (4 concentrations per compound). For the BMSC co-culture, 300 LSCe cells in 20 $\mu$ L of fresh BMSC medium were added per 384-well to the existing wells containing stroma in 30 $\mu$ L of media plated 3 days prior). 196 compounds demonstrated an  $EC_{50} \leq 5 \mu$ M against LSCe cells in the presence of one stromal type (with 139 showing activity on both types) and were selected for further study.

**Curve Fitting and Determination of  $EC_{50}$  Values.** Refined curve fitting and  $EC_{50}$  values (Figs. 3a, 3b, 4a, and Supplementary Figs. 2a, 2b, 3b, 3d, 3e, 4a, 5e) were computed and visualized using MATLAB. For each experiment combining an experimental design, cell line or primary cell population, and small molecule, we extracted  $n$  value pairs  $(x,y)$  corresponding to  $n$  independent measurements of effect ( $y$ , normalized % of positive control) *versus* concentration ( $x = \log_2[\mu$ M]) across all experiments,  $12 \leq n \leq 48$  (median  $n = 24$ ) value pairs. For each experiment, we fit two types of models to each concentration response: 4-parameter sigmoid functions and 1-parameter constant functions. In some cases,

individual data points appeared significantly aberrant from the others, so we also computed a version of each model, sigmoid or constant, after censoring individual points that failed to meet an outlier condition defined by Cook's Distance<sup>1,2</sup>, with  $D_{\text{cook}} > 4/n^2$ . For each model, we evaluated the fit parameters and their confidence intervals (CIs) to determine which of the four models was most appropriate to use for a given experiment. Models for which any of the parameter CIs were infinite (i.e., those models that did not converge) were rejected, as were sigmoid models whose height parameter was less than 25% of the positive control effect; conversely, we rejected constant models whose parameter CI range was more than 25% of the positive control effect. These filters were sufficient to indicate whether a sigmoid or constant model should be used, and we always selected the uncensored version of constant models if both were available. Some uncensored sigmoid models retained unrealistic slope parameters (too steep), so we chose the corresponding censored sigmoid model in cases where censoring improved the CI range on the slope parameter by at least 10-fold. Dose-response curves were plotted using the best available model according to these criteria. To report  $EC_{50}$  values for sigmoid models, we used the  $x$  value of the sigmoid inflection point when that point fell within the tested concentration range. When the sigmoid inflection point fell outside the tested concentration range, we reported  $EC_{50}$  values as inequalities (e.g. "< 10 nM"), rather than extrapolating. For all other experiments, data were normalized and  $EC_{50}$  values were calculated using Pipeline Pilot (Accelrys, Inc.) and GeneData Screener (GeneData).

1. Cook, R.D. & Weisberg, S. *Residuals and influence in regression*, x, 230 p. (Chapman and Hall, New York, 1982).
2. Fox, J. & Long, J.S. *Modern methods of data analysis*, 446 p. (Sage Publications, Newbury Park, Calif., 1990).
